# Supplementary material for: Clinical validation of the short and long UNESP-Botucatu scales for feline pain assessment
Source: PeerJ. 2021 Apr 12;9:e11225. doi: 10.7717/peerj.11225 (PMC8048399; doi:10.7717/peerj.11225)
Supplement: Data S1 — All pain scores from different pain assessment tools performed by the observers of all cats included in this study. These scores were used to validate the long and short UNESP-Botucatu scales for feline acute pain assessment. [file peerj-09-11225-s001.xlsx]

## Sheet: DATA
Cat	Observer	Group	Moment.in.Minutes	Rescue.Analgesia	NS	SDS	VAS	UFEPS-SF.Posture	UFEPS-SF.Miscellaneous.Behaviors	UFEPS-SF.Miscellaneous.Behaviors.Letter	UFEPS-SF.Miscellaneous.Behaviors.A	UFEPS-SF.Miscellaneous.Behaviors.B	UFEPS-SF.Miscellaneous.Behaviors.C	UFEPS-SF.Miscellaneous.Behaviors.D	UFEPS-SF.Comfort.Activity.Attitude	UFEPS-SF.Palpation.Sirgical.Wound	UFEPS-SF.Total.Score	UFEPS.Posture	UFEPS.Confort	UFEPS.Activity	UFEPS.Attitude	UFEPS.Attitude.Letter	UFEPS.Attitude.A	UFEPS.Attitude.B	UFEPS.Attitude.C	UFEPS.Attitude.D	UFEPS.Attitude.E	UFEPS.Miscellaneous.Behaviors	UFEPS.Miscellaneous.Behaviors.Letter	UFEPS.Miscellaneous.Behaviors.A	UFEPS.Miscellaneous.Behaviors.B	UFEPS.Miscellaneous.Behaviors.C	UFEPS.Miscellaneous.Behaviors.D	UFEPS.Palpation.Sirgical.Wound	UFEPS-SF.Palpation.Abdomen/flank	UFEPS.Vocalization	UFEPS.Total.Score	Glasgow CMPS-Feline.Vocalization	Glasgow CMPS-Feline.Posture/Confort	Glasgow CMPS-Feline.Attention.to.Wound	Glasgow CMPS-Feline.Ear.Position	Glasgow CMPS-Feline.Muzzle.Shape	Glasgow CMPS-Feline.Interaction	CMPS-Feline.Palpation.Wound	Glasgow CMPS-Feline.General.Impression	Glasgow CMPS-Feline.Total.Score
1	Observer.1	Orthopedic.Surgery	Baseline	No	10	4	90.2	2	1	B	0	1	0	0	3	2	8	2	2	3	2	BC	0	1	1	0	0	2	.	.	.	.	.	2	0	0	13	0	3	0	1	0	1	0	4	9
1	Observer.1	Orthopedic.Surgery	60.min.Postoperative	No	8	3	74.9	2	1	B	0	1	0	0	1	1	5	2	1	3	3	BCD	0	1	1	1	0	2	BC	0	1	1	0	1	0	0	12	0	3	0	1	0	1	1	1	7
1	Observer.1	Orthopedic.Surgery	120.min.Postoperative	Yes	5	2	45.1	1	1	B	0	1	0	0	1	1	4	1	2	2	3	BCD	0	1	1	1	0	1	C	0	0	1	0	1	0	0	10	0	0	0	1	0	1	0	2	4
1	Observer.1	Orthopedic.Surgery	180.min.Postoperative	Yes	4	2	31.2	1	1	B	0	1	0	0	0	1	3	1	1	2	2	BD	0	1	0	1	0	1	C	0	0	1	0	1	0	0	8	0	0	0	1	0	1	1	1	4
1	Observer.1	Orthopedic.Surgery	270.min.Postoperative	No	4	2	31.2	1	1	.	.	.	.	.	0	1	3	1	1	2	2	BD	0	1	0	1	0	1	A	1	0	0	0	1	0	0	8	0	0	1	0	0	1	1	2	5
1	Observer.1	Orthopedic.Surgery	330.min.Postoperative	No	3	2	23	1	0	X	0	0	0	0	1	2	4	1	1	2	3	BCD	0	1	1	1	0	0	X	0	0	0	0	1	0	0	8	0	0	0	0	0	1	1	2	4
1	Observer.1	Orthopedic.Surgery	390.min.Postoperative	No	4	2	31.7	1	1	.	.	.	.	.	1	2	5	1	1	2	2	BC	0	1	1	0	0	1	A	1	0	0	0	2	0	0	9	0	3	0	0	0	1	1	2	7
2	Observer.1	Orthopedic.Surgery	Baseline	No	3	1	11	0	0	X	0	0	0	0	0	1	1	0	0	0	0	A	1	0	0	0	0	0	X	0	0	0	0	1	0	0	1	0	0	0	0	0	0	1	0	1
2	Observer.1	Orthopedic.Surgery	60.min.Postoperative	Yes	10	4	96	2	2	AB	1	1	0	0	3	1	8	2	2	2	2	BC	0	1	1	0	0	2	BC	0	1	1	0	1	0	0	11	0	4	0	1	0	1	1	3	10
2	Observer.1	Orthopedic.Surgery	120.min.Postoperative	Yes	5	3	48	0	1	B	0	1	0	0	2	2	5	2	2	2	2	BC	0	1	1	0	0	1	C	0	0	1	0	2	0	0	11	0	1	0	1	0	1	1	1	5
2	Observer.1	Orthopedic.Surgery	210.min.Postoperative	No	4	2	16	0	0	X	0	0	0	0	1	0	1	0	0	0	0	A	1	0	0	0	0	0	X	0	0	0	0	0	0	0	0	0	0	0	0	0	0	0	0	0
2	Observer.1	Orthopedic.Surgery	270.min.Postoperative	No	4	2	28	1	0	X	0	0	0	0	1	0	2	0	0	0	0	A	1	0	0	0	0	1	.	.	.	.	.	0	0	0	1	0	0	0	0	0	0	0	1	1
2	Observer.1	Orthopedic.Surgery	330.min.Postoperative	No	5	2	46	1	0	X	0	0	0	0	1	0	2	2	0	2	0	A	1	0	0	0	0	0	X	0	0	0	0	0	0	0	4	0	0	0	1	0	0	0	0	1
2	Observer.1	Orthopedic.Surgery	390.min.Postoperative	No	3	2	23	0	0	X	0	0	0	0	2	0	2	2	2	2	2	BC	0	1	1	0	0	0	X	0	0	0	0	0	0	0	8	0	0	0	2	0	1	0	1	4
3	Observer.1	Orthopedic.Surgery	Baseline	No	3	2	11	0	0	X	0	0	0	0	0	1	1	0	0	0	0	A	1	0	0	0	0	0	X	0	0	0	0	1	0	0	1	0	0	0	0	0	0	1	0	1
3	Observer.1	Orthopedic.Surgery	60.min.Postoperative	No	7	3	70	1	0	X	0	0	0	0	2	0	3	1	1	2	2	BC	0	1	1	0	0	1	.	.	.	.	.	0	0	0	7	0	3	0	0	1	1	0	1	6
3	Observer.1	Orthopedic.Surgery	120.min.Postoperative	Yes	7	3	73	1	1	B	0	1	0	0	1	1	4	1	1	2	2	BC	0	1	1	0	0	1	C	0	0	1	0	1	0	0	8	0	3	0	0	1	0	4	1	9
3	Observer.1	Orthopedic.Surgery	180.min.Postoperative	Yes	7	3	75	1	0	X	0	0	0	0	1	2	4	2	1	2	1	C	0	0	1	0	0	0	X	0	0	0	0	2	2	0	10	0	3	0	0	0	0	1	1	5
3	Observer.1	Orthopedic.Surgery	270.min.Postoperative	Yes	4	2	37.5	1	0	X	0	0	0	0	1	2	4	1	1	2	1	C	0	0	1	0	0	0	X	0	0	0	0	2	0	0	7	0	0	0	0	0	0	4	1	5
3	Observer.1	Orthopedic.Surgery	330.min.Postoperative	No	3	2	22.5	0	0	X	0	0	0	0	1	0	1	0	1	2	1	.	0	.	.	.	.	0	X	0	0	0	0	0	0	0	4	0	0	0	0	0	0	0	1	1
3	Observer.1	Orthopedic.Surgery	390.min.Postoperative	No	3	2	19	0	0	X	0	0	0	0	0	1	1	0	0	2	1	B	0	1	0	0	0	0	X	0	0	0	0	1	0	0	4	0	0	0	0	0	0	4	0	4
4	Observer.1	Orthopedic.Surgery	Baseline	No	3	2	27.5	0	0	X	0	0	0	0	0	0	0	0	0	0	1	D	0	0	0	1	0	0	X	0	0	0	0	0	0	0	1	0	1	0	0	0	0	0	2	3
4	Observer.1	Orthopedic.Surgery	60.min.Postoperative	No	7	3	78	3	1	A	1	0	0	0	3	0	7	3	3	1	1	D	0	0	0	1	0	1	B	0	1	0	0	0	0	0	9	0	2	0	1	0	1	0	2	6
4	Observer.1	Orthopedic.Surgery	120.min.Postoperative	Yes	7	3	75.5	3	1	A	1	0	0	0	3	0	7	3	3	1	1	D	0	0	0	1	0	1	B	0	1	0	0	0	1	0	10	1	2	0	1	0	1	0	2	7
4	Observer.1	Orthopedic.Surgery	180.min.Postoperative	No	5	2	46	3	0	X	0	0	0	0	3	1	7	3	3	0	2	BD	0	1	0	1	0	0	X	0	0	0	0	1	1	0	10	0	1	0	1	0	1	0	2	5
4	Observer.1	Orthopedic.Surgery	300.min.Postoperative	No	4	2	20	3	0	X	0	0	0	0	0	0	3	3	3	1	2	BD	0	1	0	1	0	0	X	0	0	0	0	1	0	0	10	0	2	0	1	0	0	0	2	5
4	Observer.1	Orthopedic.Surgery	360.min.Postoperative	No	3	2	19	3	1	A	1	0	0	0	3	1	8	3	3	1	2	BD	0	1	0	1	0	1	B	0	1	0	0	1	0	0	11	0	1	1	0	0	1	0	2	5
5	Observer.1	Orthopedic.Surgery	Baseline	No	3	2	22	0	0	X	0	0	0	0	0	2	2	0	0	0	0	A	1	0	0	0	0	0	X	0	0	0	0	2	0	0	2	1	2	0	0	0	1	1	0	5
5	Observer.1	Orthopedic.Surgery	60.min.Postoperative	Yes	6	3	56	3	1	A	1	0	0	0	3	2	9	1	3	1	2	BD	0	1	0	1	0	1	B	0	1	0	0	2	1	2	13	0	2	0	0	1	1	2	2	8
5	Observer.1	Orthopedic.Surgery	120.min.Postoperative	Yes	3	2	25	3	0	X	0	0	0	0	3	1	7	1	3	1	1	D	0	0	0	1	0	0	X	0	0	0	0	1	0	2	9	0	2	0	0	0	0	3	2	7
5	Observer.1	Orthopedic.Surgery	210.min.Postoperative	No	2	2	17	0	0	X	0	0	0	0	0	0	0	0	0	0	0	A	1	0	0	0	0	0	X	0	0	0	0	0	0	0	0	0	0	0	0	0	0	0	0	0
5	Observer.1	Orthopedic.Surgery	270.min.Postoperative	No	2	1	13.5	0	0	X	0	0	0	0	0	1	1	0	0	0	0	A	1	0	0	0	0	0	X	0	0	0	0	1	1	0	2	0	0	0	0	0	0	0	0	0
5	Observer.1	Orthopedic.Surgery	390.min.Postoperative	No	4	2	30	1	0	X	0	0	0	0	0	1	2	1	0	2	0	A	1	0	0	0	0	0	X	0	0	0	0	1	1	0	5	0	0	0	0	1	0	0	0	1
6	Observer.1	Orthopedic.Surgery	Baseline	No	7	3	65	2	1	B	0	1	0	0	2	1	6	1	1	2	2	BC	0	1	1	0	0	1	C	0	0	1	0	1	0	0	8	0	1	0	1	1	0	0	1	4
6	Observer.1	Orthopedic.Surgery	60.min.Postoperative	No	6	3	63	1	0	X	0	0	0	0	2	2	5	1	2	3	2	BC	0	1	1	0	0	1	C	0	0	1	0	2	0	0	11	0	0	0	1	0	1	0	4	6
6	Observer.1	Orthopedic.Surgery	120.min.Postoperative	Yes	6	3	66	1	1	B	0	1	0	0	2	2	6	0	2	3	2	BC	0	1	1	0	0	1	C	0	0	1	0	2	0	0	10	0	0	0	1	1	1	0	4	7
6	Observer.1	Orthopedic.Surgery	180.min.Postoperative	No	4	2	40	1	1	B	0	1	0	0	1	2	5	1	1	3	2	BC	0	1	1	0	0	1	C	0	0	1	0	2	1	0	11	0	0	0	1	1	1	0	3	6
6	Observer.1	Orthopedic.Surgery	240.min.Postoperative	Yes	4	2	36	1	1	B	0	1	0	0	1	2	5	1	1	3	2	BC	0	1	1	0	0	1	C	0	0	1	0	2	1	0	11	0	0	0	1	1	1	0	1	4
6	Observer.1	Orthopedic.Surgery	300.min.Postoperative	No	3	2	28	0	0	X	0	0	0	0	1	1	2	0	1	3	2	BC	0	1	1	0	0	0	X	0	0	0	0	1	0	0	7	0	0	0	1	0	1	0	1	3
6	Observer.1	Orthopedic.Surgery	360.min.Postoperative	No	3	2	23.5	1	0	X	0	0	0	0	1	1	3	1	1	2	2	BC	0	1	1	0	0	0	X	0	0	0	0	1	0	0	7	0	0	0	1	0	1	0	1	3
7	Observer.1	Orthopedic.Surgery	Baseline	No	4	2	22	0	0	X	0	0	0	0	0	1	1	1	1	2	1	C	0	0	1	0	0	0	X	0	0	0	0	1	0	0	6	0	0	0	0	1	0	0	0	1
7	Observer.1	Orthopedic.Surgery	60.min.Postoperative	No	4	2	24	1	0	X	0	0	0	0	1	0	2	1	1	3	2	BC	0	1	1	0	0	0	X	0	0	0	0	0	0	0	7	0	0	0	0	0	1	2	1	4
7	Observer.1	Orthopedic.Surgery	120.min.Postoperative	No	4	2	21	0	0	X	0	0	0	0	0	1	1	0	1	2	2	BC	0	1	1	0	0	0	X	0	0	0	0	0	0	0	5	0	0	0	0	0	0	0	1	1
7	Observer.1	Orthopedic.Surgery	240.min.Postoperative	No	6	3	58	1	0	X	0	0	0	0	1	1	3	1	1	3	2	BC	0	1	1	0	0	0	X	0	0	0	0	1	0	0	8	0	0	0	0	1	0	0	1	2
7	Observer.1	Orthopedic.Surgery	360.min.Postoperative	No	4	2	24	0	0	X	0	0	0	0	0	0	0	0	0	3	0	A	1	0	0	0	0	0	X	0	0	0	0	0	0	0	3	0	0	0	0	0	0	0	1	1
8	Observer.1	Orthopedic.Surgery	Baseline	No	3	2	13	1	1	B	0	1	0	0	1	2	5	1	0	2	1	C	0	0	1	0	0	1	C	0	0	1	0	2	0	0	7	0	0	0	1	1	0	0	0	2
8	Observer.1	Orthopedic.Surgery	60.min.Postoperative	No	1	1	5	0	0	X	0	0	0	0	0	0	0	0	1	0	1	B	0	1	0	0	0	0	X	0	0	0	0	0	0	0	2	0	0	0	0	0	1	0	2	3
8	Observer.1	Orthopedic.Surgery	120.min.Postoperative	No	3	2	17.5	0	0	X	0	0	0	0	0	1	1	0	1	0	1	B	0	1	0	0	0	0	X	0	0	0	0	1	0	0	3	0	0	0	1	1	1	0	2	5
8	Observer.1	Orthopedic.Surgery	180.min.Postoperative	Yes	6	3	65	1	1	B	0	1	0	0	1	1	4	1	1	2	2	BC	0	1	1	0	0	1	C	0	0	1	0	1	0	0	8	0	2	0	1	1	0	0	3	7
8	Observer.1	Orthopedic.Surgery	270.min.Postoperative	No	3	2	22	0	0	X	0	0	0	0	0	1	1	0	0	0	0	A	1	0	0	0	0	0	X	0	0	0	0	1	0	0	1	0	0	0	1	1	1	0	2	5
8	Observer.1	Orthopedic.Surgery	390.min.Postoperative	No	3	2	35	1	0	X	0	0	0	0	3	0	4	1	0	0	1	B	0	1	0	0	0	0	X	0	0	0	0	0	0	0	2	1	2	0	1	1	0	0	2	7
9	Observer.1	Orthopedic.Surgery	Baseline	No	2	1	5	0	0	X	0	0	0	0	1	1	2	0	1	2	2	BC	0	1	1	0	0	0	X	0	0	0	0	1	0	0	6	0	0	0	1	1	1	0	1	4
9	Observer.1	Orthopedic.Surgery	60.min.Postoperative	Yes	9	4	89	2	1	A	1	0	0	0	1	2	6	2	1	2	2	BC	0	1	1	0	0	2	BC	0	1	1	0	2	0	2	13	0	3	0	1	2	0	0	1	7
9	Observer.1	Orthopedic.Surgery	150.min.Postoperative	No	6	3	61.5	1	0	X	0	0	0	0	1	2	4	1	1	2	1	C	0	0	1	0	0	0	X	0	0	0	0	2	1	2	10	0	1	0	1	1	0	0	1	4
9	Observer.1	Orthopedic.Surgery	270.min.Postoperative	Yes	6	3	55	1	1	B	0	1	0	0	1	1	4	1	0	2	1	C	0	0	1	0	0	1	C	0	0	1	0	1	1	0	7	0	0	0	1	1	0	0	0	2
9	Observer.1	Orthopedic.Surgery	390.min.Postoperative	No	4	2	54.5	1	0	X	0	0	0	0	0	1	2	1	0	2	0	A	1	0	0	0	0	0	X	0	0	0	0	1	0	0	4	0	0	0	1	1	0	4	0	6
10	Observer.1	Orthopedic.Surgery	Baseline	No	2	1	11	0	0	X	0	0	0	0	0	1	1	0	0	2	0	A	1	0	0	0	0	0	X	0	0	0	0	1	1	0	4	0	0	0	0	1	0	2	0	3
10	Observer.1	Orthopedic.Surgery	60.min.Postoperative	Yes	5	2	47.5	1	0	X	0	0	0	0	1	2	4	1	1	2	0	A	1	0	0	0	0	0	X	0	0	0	0	2	1	0	7	0	0	0	0	0	0	2	0	2
10	Observer.1	Orthopedic.Surgery	150.min.Postoperative	Yes	6	3	55	1	0	X	0	0	0	0	1	2	4	1	1	2	1	C	0	0	1	0	0	0	X	0	0	0	0	2	1	1	9	0	0	0	1	1	0	2	0	4
10	Observer.1	Orthopedic.Surgery	210.min.Postoperative	No	3	2	26	1	0	X	0	0	0	0	0	1	2	1	0	2	0	A	1	0	0	0	0	0	X	0	0	0	0	1	0	0	4	0	0	0	0	0	0	2	0	2
10	Observer.1	Orthopedic.Surgery	270.min.Postoperative	No	4	2	32	3	0	X	0	0	0	0	3	1	7	3	1	2	1	C	0	0	1	0	0	0	X	0	0	0	0	1	0	3	11	0	2	1	0	0	0	2	2	7
10	Observer.1	Orthopedic.Surgery	330.min.Postoperative	No	4	2	32	1	0	X	0	0	0	0	0	1	2	1	0	2	0	A	1	0	0	0	0	0	X	0	0	0	0	1	0	1	5	0	0	0	0	0	0	2	0	2
10	Observer.1	Orthopedic.Surgery	390.min.Postoperative	No	3	2	16	0	0	X	0	0	0	0	0	1	1	0	0	2	0	A	1	0	0	0	0	0	X	0	0	0	0	1	1	0	4	0	0	0	0	0	0	0	0	0
11	Observer.1	Orthopedic.Surgery	Baseline	No	4	2	28	1	1	B	0	1	0	0	1	0	3	1	1	3	3	BCD	0	1	1	1	0	1	C	0	0	1	0	0	0	0	9	0	0	0	1	0	1	0	2	4
11	Observer.1	Orthopedic.Surgery	60.min.Postoperative	No	7	3	69	3	1	A	1	0	0	0	3	0	7	3	3	1	1	B	0	1	0	0	0	1	B	0	1	0	0	0	0	0	9	0	2	0	1	1	1	0	2	7
11	Observer.1	Orthopedic.Surgery	120.min.Postoperative	Yes	7	3	71	1	1	A	1	0	0	0	1	2	5	1	1	3	1	C	0	0	1	0	0	1	B	0	1	0	0	2	1	0	10	0	0	0	1	2	0	0	1	4
11	Observer.1	Orthopedic.Surgery	180.min.Postoperative	No	4	2	32	0	0	X	0	0	0	0	1	1	2	0	1	3	1	C	0	0	1	0	0	0	X	0	0	0	0	1	1	0	7	0	0	0	0	1	0	0	1	2
11	Observer.1	Orthopedic.Surgery	240.min.Postoperative	Yes	4	2	32	0	1	C	0	0	1	0	1	1	3	0	1	3	1	C	0	0	1	0	0	1	C	0	0	1	0	1	0	2	9	0	0	0	1	0	0	3	1	5
11	Observer.1	Orthopedic.Surgery	300.min.Postoperative	No	5	2	40	1	0	X	0	0	0	0	1	1	3	1	1	3	2	BC	0	1	1	0	0	0	X	0	0	0	0	1	0	0	8	0	0	0	1	1	1	0	1	4
11	Observer.1	Orthopedic.Surgery	360.min.Postoperative	No	4	2	35	0	1	B	0	1	0	0	1	1	3	0	1	3	1	C	0	0	1	0	0	1	C	0	0	1	0	1	0	0	7	0	0	0	1	1	0	0	1	3
12	Observer.1	Orthopedic.Surgery	Baseline	No	1	1	0	0	1	B	0	1	0	0	1	1	3	0	0	2	1	C	0	0	1	0	0	1	C	0	0	1	0	1	0	0	5	0	1	0	0	1	0	0	1	3
12	Observer.1	Orthopedic.Surgery	60.min.Postoperative	No	7	3	73	1	1	A	1	0	0	0	2	1	5	1	2	3	2	BC	0	1	1	0	0	1	B	0	1	0	0	1	0	2	12	0	0	0	1	1	1	0	1	4
12	Observer.1	Orthopedic.Surgery	120.min.Postoperative	Yes	7	3	75	1	1	B	0	1	0	0	2	1	5	1	2	3	2	BC	0	1	1	0	0	1	C	0	0	1	0	1	0	2	12	0	0	0	2	1	1	0	1	5
12	Observer.1	Orthopedic.Surgery	210.min.Postoperative	Yes	5	3	59	1	1	B	0	1	0	0	1	2	5	1	1	2	2	CD	0	0	1	1	0	2	CD	0	0	1	1	2	0	2	12	0	0	0	1	0	1	3	1	6
12	Observer.1	Orthopedic.Surgery	270.min.Postoperative	No	5	3	52	1	0	X	0	0	0	0	1	1	3	1	1	3	1	C	0	0	1	0	0	0	X	0	0	0	0	1	1	0	8	0	0	0	1	1	1	0	1	4
12	Observer.1	Orthopedic.Surgery	390.min.Postoperative	No	4	2	27	1	1	A	1	0	0	0	1	1	4	1	1	2	1	C	0	0	1	0	0	1	B	0	1	0	0	1	1	0	8	0	0	0	1	2	0	1	1	5
13	Observer.1	Soft.Tissue.Surgery	Baseline	No	7	3	75	1	1	B	0	1	0	0	1	1	4	2	2	2	2	BC	0	1	1	0	0	1	C	0	0	1	0	1	0	0	10	0	3	0	1	0	0	0	1	5
13	Observer.1	Soft.Tissue.Surgery	60.min.Postoperative	Yes	9	4	95	2	1	B	0	1	0	0	2	2	7	2	2	3	2	BC	0	1	1	0	0	3	.	.	.	.	.	2	2	0	16	0	4	0	1	0	1	1	4	11
13	Observer.1	Soft.Tissue.Surgery	120.min.Postoperative	No	8	4	87	2	1	B	0	1	0	0	2	2	7	2	2	3	2	BC	0	1	1	0	0	1	C	0	0	1	0	2	1	2	15	0	4	0	1	2	1	2	4	14
13	Observer.1	Soft.Tissue.Surgery	180.min.Postoperative	Yes	8	3	83	2	1	B	0	1	0	0	2	0	5	2	2	3	2	BC	0	1	1	0	0	1	C	0	0	1	0	0	0	0	10	0	3	0	0	0	0	0	4	7
13	Observer.1	Soft.Tissue.Surgery	270.min.Postoperative	No	5	2	50	1	1	B	0	1	0	0	1	0	3	2	2	2	2	BC	0	1	1	0	0	1	C	0	0	1	0	0	0	0	9	0	0	0	1	0	0	0	3	4
13	Observer.1	Soft.Tissue.Surgery	330.min.Postoperative	No	6	2	55	1	1	B	0	1	0	0	2	0	4	1	2	3	2	BC	0	1	1	0	0	1	C	0	0	1	0	0	0	0	9	0	3	0	1	0	1	0	3	8
13	Observer.1	Soft.Tissue.Surgery	390.min.Postoperative	No	6	2	58	1	1	B	0	1	0	0	2	1	5	2	2	3	2	BC	0	1	1	0	0	1	C	0	0	1	0	1	1	2	14	0	3	0	1	0	0	2	3	9
14	Observer.1	Soft.Tissue.Surgery	Baseline	No	1	1	3	0	0	X	0	0	0	0	0	0	0	0	0	0	0	A	1	0	0	0	0	0	X	0	0	0	0	0	1	0	1	0	0	0	0	0	0	0	1	1
14	Observer.1	Soft.Tissue.Surgery	60.min.Postoperative	No	3	2	22	0	1	B	0	1	0	0	0	2	3	0	0	0	0	A	1	0	0	0	0	1	C	0	0	1	0	2	0	0	3	0	1	0	0	0	0	1	0	2
14	Observer.1	Soft.Tissue.Surgery	120.min.Postoperative	No	2	2	17	0	0	X	0	0	0	0	0	1	1	0	0	0	0	A	1	0	0	0	0	0	X	0	0	0	0	1	0	0	1	0	0	0	0	0	0	0	1	1
14	Observer.1	Soft.Tissue.Surgery	240.min.Postoperative	No	2	1	11	0	0	X	0	0	0	0	0	1	1	0	1	2	0	A	1	0	0	0	0	0	X	0	0	0	0	1	0	0	4	0	0	0	0	0	0	0	1	1
14	Observer.1	Soft.Tissue.Surgery	360.min.Postoperative	No	2	1	6.5	0	0	X	0	0	0	0	0	2	2	0	0	0	0	A	1	0	0	0	0	0	X	0	0	0	0	2	0	0	2	0	0	0	0	0	0	0	0	0
15	Observer.1	Soft.Tissue.Surgery	Baseline	No	1	1	1	0	1	.	.	.	.	.	0	0	1	0	1	2	1	B	0	1	0	0	0	1	.	.	.	.	.	0	0	0	5	0	0	0	0	0	1	0	1	2
15	Observer.1	Soft.Tissue.Surgery	60.min.Postoperative	No	7	3	72	1	0	X	0	0	0	0	1	0	2	1	1	2	1	B	0	1	0	0	0	1	.	.	.	.	.	0	0	0	6	0	1	0	1	0	1	0	1	4
15	Observer.1	Soft.Tissue.Surgery	120.min.Postoperative	No	7	2	68	1	1	B	0	1	0	0	1	1	4	2	1	2	1	B	0	1	0	0	0	1	C	0	0	1	0	1	1	0	9	0	3	0	1	0	1	1	1	7
15	Observer.1	Soft.Tissue.Surgery	180.min.Postoperative	Yes	7	2	72	3	1	B	0	1	0	0	1	1	6	1	1	1	1	B	0	1	0	0	0	1	C	0	0	1	0	1	0	0	6	0	3	0	1	0	0	0	1	5
15	Observer.1	Soft.Tissue.Surgery	240.min.Postoperative	No	5	2	48	1	0	X	0	0	0	0	1	0	2	1	1	2	2	BC	0	1	1	0	0	0	X	0	0	0	0	0	0	0	6	0	0	0	1	0	0	1	1	3
15	Observer.1	Soft.Tissue.Surgery	360.min.Postoperative	No	3	2	20	1	0	X	0	0	0	0	1	1	3	1	1	2	2	BC	0	1	1	0	0	0	X	0	0	0	0	1	0	0	7	0	0	0	0	0	0	0	1	1
16	Observer.1	Soft.Tissue.Surgery	Baseline	No	2	2	7	1	1	C	0	0	1	0	1	1	4	1	0	2	0	A	1	0	0	0	0	1	D	0	0	0	1	1	0	0	5	0	0	1	0	0	0	0	0	1
16	Observer.1	Soft.Tissue.Surgery	60.min.Postoperative	No	X	X	X	X	X	X	X	X	X	X	X	X	X	X	X	X	X	X	X	X	X	X	X	X	X	X	X	X	X	X	X	X	X	X	X	X	X	X	X	X	X	X
16	Observer.1	Soft.Tissue.Surgery	120.min.Postoperative	Yes	9	4	93	2	1	.	.	.	.	.	2	0	5	2	2	2	2	BC	0	1	1	0	0	1	.	.	.	.	.	0	0	0	9	0	4	0	1	1	1	0	4	11
16	Observer.1	Soft.Tissue.Surgery	180.min.Postoperative	Yes	9	4	91	2	1	A	1	0	0	0	2	2	7	2	2	2	2	BC	0	1	1	0	0	1	B	0	1	0	0	2	1	2	14	0	4	0	2	1	1	2	3	13
16	Observer.1	Soft.Tissue.Surgery	270.min.Postoperative	Yes	7	3	75	2	1	A	1	0	0	0	3	2	8	2	2	3	2	BC	0	1	1	0	0	1	B	0	1	0	0	2	1	2	15	0	1	0	1	0	1	2	3	8
16	Observer.1	Soft.Tissue.Surgery	330.min.Postoperative	Yes	6	3	72	2	1	A	1	0	0	0	2	1	6	1	2	3	2	BC	0	1	1	0	0	1	B	0	1	0	0	1	1	0	11	0	3	0	1	1	1	0	1	7
16	Observer.1	Soft.Tissue.Surgery	390.min.Postoperative	No	5	3	55	2	1	B	0	1	0	0	2	2	7	2	2	3	2	BC	0	1	1	0	0	1	C	0	0	1	0	2	2	0	14	0	0	0	1	0	1	0	3	5
17	Observer.1	Soft.Tissue.Surgery	Baseline	No	2	1	3	0	0	X	0	0	0	0	1	0	1	0	0	2	1	C	0	0	1	0	0	0	X	0	0	0	0	0	0	0	3	0	0	0	0	0	0	0	1	1
17	Observer.1	Soft.Tissue.Surgery	60.min.Postoperative	Yes	6	3	55	1	0	X	0	0	0	0	1	2	4	1	1	2	2	BC	0	1	1	0	0	1	C	0	0	1	0	2	1	0	10	0	0	0	1	1	0	0	1	3
17	Observer.1	Soft.Tissue.Surgery	120.min.Postoperative	Yes	3	2	18	1	0	X	0	0	0	0	1	2	4	1	1	2	2	BC	0	1	1	0	0	0	X	0	0	0	0	2	1	0	9	0	0	0	1	0	0	0	1	2
17	Observer.1	Soft.Tissue.Surgery	210.min.Postoperative	No	2	2	9	0	0	X	0	0	0	0	0	2	2	0	0	0	0	A	1	0	0	0	0	0	X	0	0	0	0	2	0	0	2	0	0	0	0	0	0	0	0	0
17	Observer.1	Soft.Tissue.Surgery	270.min.Postoperative	No	4	2	21	1	0	X	0	0	0	0	1	1	3	1	0	2	1	C	0	0	1	0	0	0	X	0	0	0	0	1	0	0	5	0	0	0	0	1	0	0	1	2
17	Observer.1	Soft.Tissue.Surgery	390.min.Postoperative	No	5	2	27	1	1	A	1	0	0	0	1	2	5	1	0	2	1	C	0	0	1	0	0	1	B	0	1	0	0	2	1	0	8	0	3	0	2	2	0	1	1	9
18	Observer.1	Soft.Tissue.Surgery	Baseline	No	7	3	74	1	1	B	0	1	0	0	1	2	5	1	2	3	2	BC	0	1	1	0	0	1	C	0	0	1	0	2	0	2	13	0	0	0	2	1	1	2	1	7
18	Observer.1	Soft.Tissue.Surgery	60.min.Postoperative	No	8	3	79	3	0	X	0	0	0	0	0	2	5	0	0	1	0	A	1	0	0	0	0	0	X	0	0	0	0	2	0	0	3	0	2	0	1	0	0	0	2	5
18	Observer.1	Soft.Tissue.Surgery	120.min.Postoperative	No	7	3	76	0	1	B	0	1	0	0	0	2	3	0	0	2	0	A	1	0	0	0	0	1	C	0	0	1	0	2	0	0	5	0	0	0	1	1	0	0	0	2
18	Observer.1	Soft.Tissue.Surgery	180.min.Postoperative	No	4	2	32	0	1	B	0	1	0	0	0	2	3	0	0	2	0	A	1	0	0	0	0	1	C	0	0	1	0	2	0	0	5	0	0	0	1	1	0	1	0	3
18	Observer.1	Soft.Tissue.Surgery	300.min.Postoperative	No	7	3	64	0	1	B	0	1	0	0	0	2	3	0	0	2	0	A	1	0	0	0	0	1	C	0	0	1	0	2	0	0	5	0	0	0	1	2	0	1	0	4
18	Observer.1	Soft.Tissue.Surgery	360.min.Postoperative	No	5	2	66	0	1	B	0	1	0	0	0	2	3	0	0	2	0	A	1	0	0	0	0	1	C	0	0	1	0	2	0	0	5	0	0	0	1	1	0	0	0	2
19	Observer.1	Soft.Tissue.Surgery	Baseline	No	7	3	71	1	1	B	0	1	0	0	1	2	5	1	1	2	2	BD	0	1	0	1	0	1	C	0	0	1	0	2	0	0	9	0	2	0	1	2	0	1	2	8
19	Observer.1	Soft.Tissue.Surgery	60.min.Postoperative	Yes	8	4	90	2	0	X	0	0	0	0	3	2	7	2	2	3	2	BC	0	1	1	0	0	1	C	0	0	1	0	2	2	3	17	1	2	0	1	2	1	3	3	13
19	Observer.1	Soft.Tissue.Surgery	120.min.Postoperative	No	5	2	44	1	1	B	0	1	0	0	1	0	3	1	2	3	2	BC	0	1	1	0	0	1	C	0	0	1	0	0	0	0	9	0	0	0	1	0	1	0	1	3
19	Observer.1	Soft.Tissue.Surgery	240.min.Postoperative	No	3	2	31	1	1	B	0	1	0	0	0	0	2	1	1	2	1	C	0	0	1	0	0	1	C	0	0	1	0	0	0	1	7	0	0	0	1	1	0	0	0	2
19	Observer.1	Soft.Tissue.Surgery	360.min.Postoperative	No	3	2	28	0	1	B	0	1	0	0	1	1	3	0	1	2	1	C	0	0	1	0	0	1	C	0	0	1	0	1	0	0	6	0	0	0	1	0	0	0	1	2
21	Observer.1	Soft.Tissue.Surgery	Baseline	No	1	1	0	0	0	X	0	0	0	0	0	0	0	0	0	2	1	C	0	0	1	0	0	0	X	0	0	0	0	0	0	0	3	0	0	0	0	1	0	0	2	3
21	Observer.1	Soft.Tissue.Surgery	60.min.Postoperative	No	4	2	27	3	0	X	0	0	0	0	0	1	4	0	0	1	1	B	0	1	0	0	0	0	X	0	0	0	0	1	1	0	4	0	2	0	0	1	1	0	0	4
21	Observer.1	Soft.Tissue.Surgery	120.min.Postoperative	No	3	2	22	0	0	X	0	0	0	0	0	1	1	0	0	2	0	A	1	0	0	0	0	0	X	0	0	0	0	1	1	0	4	0	0	0	0	1	0	0	0	1
21	Observer.1	Soft.Tissue.Surgery	240.min.Postoperative	No	3	2	16	0	0	X	0	0	0	0	0	1	1	0	0	2	0	A	1	0	0	0	0	0	X	0	0	0	0	1	1	0	4	0	0	0	0	1	0	0	0	1
21	Observer.1	Soft.Tissue.Surgery	360.min.Postoperative	No	3	2	14	0	0	X	0	0	0	0	0	1	1	0	0	2	1	C	0	0	1	0	0	0	X	0	0	0	0	1	1	0	5	0	0	0	0	1	0	0	0	1
23	Observer.1	Clinical	Baseline	Yes	10	4	90.2	2	1	B	0	1	0	0	3	2	8	2	2	3	2	BC	0	1	1	0	0	2	.	.	.	.	.	2	0	0	13	0	3	0	1	0	1	0	4	9
23	Observer.1	Clinical	20.min.After.Rescue.Analgesia	No	9	4	83.5	2	1	C	0	0	1	0	1	2	6	2	1	3	3	BCD	0	1	1	1	0	1	D	0	0	0	1	2	0	0	12	0	1	1	1	0	1	0	2	6
24	Observer.1	Clinical	Baseline	Yes	9	4	98	1	1	B	0	1	0	0	2	2	6	1	2	2	2	BC	0	1	1	0	0	2	AC	1	0	1	0	2	0	0	11	0	3	0	2	1	1	1	4	12
24	Observer.1	Clinical	20.min.After.Rescue.Analgesia	No	7	3	75	1	0	X	0	0	0	0	2	0	3	0	2	2	1	C	0	0	1	0	0	1	C	0	0	1	0	0	0	1	7	0	0	0	2	1	0	0	0	3
25	Observer.1	Clinical	Baseline	Yes	8	3	89	1	1	B	0	1	0	0	2	2	6	1	1	2	2	BC	0	1	1	0	0	1	C	0	0	1	0	2	0	1	10	0	3	0	1	2	0	1	1	8
25	Observer.1	Clinical	20.min.After.Rescue.Analgesia	No	3	2	26	0	0	X	0	0	0	0	0	1	1	0	0	0	0	A	1	0	0	0	0	0	X	0	0	0	0	1	0	1	2	0	0	0	0	0	0	0	0	0
26	Observer.1	Clinical	Baseline	Yes	7	3	75	1	1	B	0	1	0	0	1	1	4	2	2	2	2	BC	0	1	1	0	0	1	C	0	0	1	0	1	0	0	10	0	3	0	1	0	0	0	1	5
26	Observer.1	Clinical	20.min.After.Rescue.Analgesia	No	3	2	23	1	1	.	.	.	.	.	1	0	3	1	1	2	1	.	0	.	.	.	.	1	.	.	.	.	.	0	0	0	6	0	3	0	1	0	0	0	1	5
27	Observer.1	Clinical	Baseline	Yes	8	3	86.5	1	1	B	0	1	0	0	1	2	5	1	2	3	2	BC	0	1	1	0	0	1	C	0	0	1	0	2	0	2	13	0	0	0	1	1	1	3	1	7
27	Observer.1	Clinical	20.min.After.Rescue.Analgesia	No	6	2	59	1	0	X	0	0	0	0	2	1	4	0	2	3	2	BC	0	1	1	0	0	1	C	0	0	1	0	1	0	2	11	0	0	0	0	0	0	3	1	4
28	Observer.1	Clinical	Baseline	Yes	5	3	54	1	1	B	0	1	0	0	1	1	4	1	1	2	1	C	0	0	1	0	0	1	C	0	0	1	0	1	0	0	7	0	0	0	1	1	0	1	1	4
28	Observer.1	Clinical	20.min.After.Rescue.Analgesia	No	2	1	19	0	0	X	0	0	0	0	1	1	2	0	1	2	1	C	0	0	1	0	0	0	X	0	0	0	0	1	0	0	5	0	0	0	0	0	0	1	1	2
29	Observer.1	Clinical	Baseline	Yes	8	4	94	1	1	B	0	1	0	0	2	2	6	1	2	3	2	BC	0	1	1	0	0	1	C	0	0	1	0	2	1	0	12	0	0	0	1	1	1	1	3	7
29	Observer.1	Clinical	20.min.After.Rescue.Analgesia	No	5	3	73	0	1	B	0	1	0	0	2	2	5	0	1	3	2	BC	0	1	1	0	0	1	C	0	0	1	0	2	0	0	9	0	0	0	1	0	0	1	3	5
30	Observer.1	Clinical	Baseline	Yes	9	4	95	1	1	B	0	1	0	0	2	2	6	1	2	2	2	BC	0	1	1	0	0	1	C	0	0	1	0	2	1	0	11	0	0	0	1	2	1	1	4	9
30	Observer.1	Clinical	20.min.After.Rescue.Analgesia	No	7	3	78	1	1	B	0	1	0	0	2	0	4	1	2	2	2	BC	0	1	1	0	0	1	C	0	0	1	0	0	0	0	8	0	0	0	1	2	1	0	4	8
31	Observer.1	Clinical	Baseline	Yes	3	2	15	1	1	B	0	1	0	0	1	1	4	1	1	2	1	C	0	0	1	0	0	1	C	0	0	1	0	1	1	0	8	0	0	0	1	0	0	0	1	2
31	Observer.1	Clinical	20.min.After.Rescue.Analgesia	No	1	1	2	1	0	X	0	0	0	0	0	0	1	0	1	2	1	B	0	1	0	0	0	0	X	0	0	0	0	0	2	0	6	0	0	0	1	0	0	0	1	2
32	Observer.1	Clinical	Baseline	Yes	3	2	16	1	1	C	0	0	1	0	1	2	5	1	1	2	1	B	0	1	0	0	0	1	D	0	0	0	1	1	2	0	9	0	2	1	1	0	1	1	1	7
32	Observer.1	Clinical	20.min.After.Rescue.Analgesia	No	2	1	3	0	0	X	0	0	0	0	1	2	3	0	1	2	1	C	0	0	1	0	0	0	X	0	0	0	0	1	2	0	7	0	0	0	1	0	1	1	0	3
33	Observer.1	Clinical	Baseline	Yes	5	2	43	1	0	X	0	0	0	0	1	2	4	1	1	2	2	BD	0	1	0	1	0	0	X	0	0	0	0	2	1	0	9	0	3	0	2	1	1	1	2	10
33	Observer.1	Clinical	20.min.After.Rescue.Analgesia	No	2	2	18	1	1	B	0	1	0	0	1	0	3	1	1	2	2	BD	0	1	0	1	0	1	C	0	0	1	0	0	0	1	8	0	0	0	2	0	1	0	2	5
34	Observer.1	Clinical	Baseline	Yes	7	3	62	2	1	B	0	1	0	0	2	2	7	1	2	3	2	BC	0	1	1	0	0	1	C	0	0	1	0	2	1	2	14	0	3	0	2	2	1	2	2	12
34	Observer.1	Clinical	20.min.After.Rescue.Analgesia	No	7	3	60	2	0	X	0	0	0	0	2	1	5	1	2	3	2	BC	0	1	1	0	0	0	X	0	0	0	0	1	1	2	12	0	3	0	2	2	1	2	1	11
35	Observer.1	Clinical	Baseline	Yes	5	2	41	1	1	B	0	1	0	0	2	2	6	1	2	3	2	BC	0	1	1	0	0	1	C	0	0	1	0	2	2	2	15	0	0	0	1	1	1	2	3	8
35	Observer.1	Clinical	20.min.After.Rescue.Analgesia	No	3	2	27	1	1	B	0	1	0	0	1	2	5	1	1	3	2	BC	0	1	1	0	0	1	C	0	0	1	0	2	2	2	14	0	0	0	0	1	0	2	1	4
36	Observer.1	Clinical	Baseline	Yes	5	2	32	1	1	A	1	0	0	0	1	2	5	1	1	2	2	BD	0	1	0	1	0	1	B	0	1	0	0	2	1	2	12	0	0	0	0	1	1	3	2	7
36	Observer.1	Clinical	20.min.After.Rescue.Analgesia	No	3	2	15	0	0	X	0	0	0	0	0	1	1	0	1	2	2	BD	0	1	0	1	0	0	X	0	0	0	0	1	0	0	6	0	0	0	0	0	1	1	2	4
37	Observer.1	Clinical	Baseline	Yes	5	2	43	1	0	X	0	0	0	0	1	2	4	1	1	2	2	BD	0	1	0	1	0	0	X	0	0	0	0	2	1	0	9	0	1	0	1	1	1	1	1	6
37	Observer.1	Clinical	20.min.After.Rescue.Analgesia	No	3	2	25	0	0	X	0	0	0	0	0	0	0	0	0	2	1	D	0	0	0	1	0	0	X	0	0	0	0	0	1	0	4	0	0	0	1	0	0	0	1	2
38	Observer.1	Clinical	Baseline	Yes	6	3	51	1	2	BD	0	1	0	1	1	2	6	1	1	2	2	BD	0	1	0	1	0	2	AC	1	0	1	0	2	2	2	14	0	0	0	0	1	1	2	1	5
38	Observer.1	Clinical	20.min.After.Rescue.Analgesia	No	4	2	34	1	0	X	0	0	0	0	1	2	4	1	1	2	1	C	0	0	1	0	0	0	X	0	0	0	0	2	2	2	11	0	0	0	0	0	0	2	1	3
39	Observer.1	Clinical	Baseline	Yes	6	3	62	2	1	B	0	1	0	0	2	1	6	2	2	3	2	BC	0	1	1	0	0	1	C	0	0	1	0	1	1	0	12	0	3	0	1	1	1	2	3	11
39	Observer.1	Clinical	20.min.After.Rescue.Analgesia	No	4	2	27	1	0	X	0	0	0	0	2	1	4	1	2	2	2	BC	0	1	1	0	0	0	X	0	0	0	0	1	0	0	8	0	0	0	1	1	1	1	3	7
40	Observer.1	Clinical	Baseline	Yes	5	2	45	1	1	B	0	1	0	0	1	1	4	1	1	2	1	D	0	0	0	1	0	1	C	0	0	1	0	1	0	0	7	0	0	0	1	2	1	1	2	7
40	Observer.1	Clinical	20.min.After.Rescue.Analgesia	No	2	1	13	1	0	X	0	0	0	0	1	0	2	1	1	3	1	B	0	1	0	0	0	0	X	0	0	0	0	0	0	0	6	0	0	0	0	0	1	0	1	2
41	Observer.1	Clinical	Baseline	Yes	4	2	28	1	1	B	0	1	0	0	1	1	4	1	1	2	0	A	1	0	0	0	0	1	C	0	0	1	0	1	0	0	6	0	0	0	1	1	0	4	1	7
41	Observer.1	Clinical	20.min.After.Rescue.Analgesia	No	2	1	9	1	0	X	0	0	0	0	1	0	2	1	1	3	2	CD	0	0	1	1	0	0	X	0	0	0	0	0	1	0	8	0	2	0	0	0	0	0	2	4
42	Observer.1	Clinical	Baseline	Yes	6	3	66	1	0	X	0	0	0	0	0	1	2	1	1	2	1	B	0	1	0	0	0	0	X	0	0	0	0	1	0	0	6	0	0	0	1	0	1	0	1	3
42	Observer.1	Clinical	20.min.After.Rescue.Analgesia	No	2	1	9	0	0	X	0	0	0	0	0	1	1	0	1	3	2	BC	0	1	1	0	0	0	X	0	0	0	0	1	0	0	7	0	0	0	0	0	0	0	1	1
43	Observer.1	Control	Baseline	Not.Aplicable	1	1	2	0	0	X	0	0	0	0	0	1	1	0	1	0	1	.	0	.	.	.	.	0	X	0	0	0	0	0	1	0	3	0	1	0	0	0	1	0	2	4
43	Observer.1	Control	30.min.Postoperative	Not.Aplicable	1	1	2	0	0	X	0	0	0	0	0	3	3	0	0	0	0	A	1	0	0	0	0	0	X	0	0	0	0	3	3	0	6	0	0	0	0	0	1	4	0	5
43	Observer.1	Control	60.min.Postoperative	Not.Aplicable	1	1	2	1	0	X	0	0	0	0	0	0	1	0	0	0	0	A	1	0	0	0	0	0	X	0	0	0	0	0	0	0	0	0	0	0	0	0	0	0	0	0
43	Observer.1	Control	90.min.Postoperative	Not.Aplicable	1	1	2.5	0	0	X	0	0	0	0	0	2	2	0	0	0	0	A	1	0	0	0	0	0	X	0	0	0	0	0	2	0	2	0	0	.	0	0	0	1	0	1
43	Observer.1	Control	120.min.Postoperative	Not.Aplicable	1	1	3	0	1	.	.	.	.	.	0	2	3	0	0	0	0	A	1	0	0	0	0	1	.	.	.	.	.	0	2	0	3	0	0	.	0	0	0	1	1	2
44	Observer.1	Control	Baseline	Not.Aplicable	1	1	3	0	0	X	0	0	0	0	0	0	0	0	0	0	1	.	0	.	.	.	.	0	X	0	0	0	0	0	0	0	1	0	0	0	0	0	1	0	2	3
44	Observer.1	Control	30.min.Postoperative	Not.Aplicable	1	1	2	0	0	X	0	0	0	0	0	0	0	0	0	0	0	A	1	0	0	0	0	0	X	0	0	0	0	0	0	0	0	0	1	0	0	0	0	0	0	1
44	Observer.1	Control	60.min.Postoperative	Not.Aplicable	1	1	1	0	0	X	0	0	0	0	0	0	0	0	0	0	0	A	1	0	0	0	0	0	X	0	0	0	0	0	0	0	0	0	1	0	0	0	0	0	0	1
44	Observer.1	Control	90.min.Postoperative	Not.Aplicable	1	1	1.5	0	0	X	0	0	0	0	0	0	0	0	0	0	0	A	1	0	0	0	0	0	X	0	0	0	0	0	0	0	0	0	0	0	0	0	1	0	0	1
44	Observer.1	Control	120.min.Postoperative	Not.Aplicable	1	1	1	0	0	X	0	0	0	0	0	0	0	0	0	0	0	A	1	0	0	0	0	0	X	0	0	0	0	0	0	0	0	0	0	0	0	0	0	0	0	0
45	Observer.1	Control	Baseline	Not.Aplicable	1	1	2	1	1	B	0	1	0	0	1	3	6	1	2	2	3	BCD	0	1	1	1	0	1	C	0	0	1	0	3	3	0	15	0	2	0	2	0	1	.	2	7
45	Observer.1	Control	30.min.Postoperative	Not.Aplicable	1	1	3	1	1	B	0	1	0	0	2	3	7	1	1	3	3	BCDE	0	1	1	1	1	1	C	0	0	1	0	3	3	2	17	0	2	0	2	0	1	2	2	9
45	Observer.1	Control	60.min.Postoperative	Not.Aplicable	1	1	2.5	1	1	B	0	1	0	0	2	3	7	1	1	3	3	BCD	0	1	1	1	0	1	C	0	0	1	0	2	2	2	15	0	2	0	2	0	1	2	2	9
45	Observer.1	Control	90.min.Postoperative	Not.Aplicable	1	1	2.5	0	1	B	0	1	0	0	2	0	3	0	2	3	3	BCD	0	1	1	1	0	1	C	0	0	1	0	0	0	0	9	0	0	0	2	0	1	0	2	5
45	Observer.1	Control	120.min.Postoperative	Not.Aplicable	1	1	2	0	1	B	0	1	0	0	2	0	3	0	2	3	3	BCDE	0	1	1	1	1	1	C	0	0	1	0	0	0	2	11	0	0	0	1	0	1	0	2	4
46	Observer.1	Control	Baseline	Not.Aplicable	1	1	3	1	0	X	0	0	0	0	1	0	2	1	1	2	3	BCDE	0	1	1	1	1	0	X	0	0	0	0	0	0	2	9	0	2	0	1	0	2	1	2	8
46	Observer.1	Control	30.min.Postoperative	Not.Aplicable	1	1	4	1	1	B	0	1	0	0	1	0	3	1	1	2	3	BCDE	0	1	1	1	1	1	C	0	0	1	0	0	0	2	10	0	2	0	1	0	1	1	2	7
46	Observer.1	Control	60.min.Postoperative	Not.Aplicable	1	1	3	1	1	B	0	1	0	0	2	0	4	1	1	2	3	BCDE	0	1	1	1	1	1	C	0	0	1	0	0	0	2	10	0	2	0	1	0	1	1	2	7
46	Observer.1	Control	90.min.Postoperative	Not.Aplicable	1	1	2	1	1	B	0	1	0	0	1	3	6	1	2	2	3	BCDE	0	1	1	1	1	1	C	0	0	1	0	3	3	2	17	0	2	0	1	0	1	3	2	9
46	Observer.1	Control	120.min.Postoperative	Not.Aplicable	1	1	2	1	1	B	0	1	0	0	1	3	6	1	1	2	3	BCDE	0	1	1	1	1	1	C	0	0	1	0	3	3	3	17	0	2	0	1	0	1	3	3	10
47	Observer.1	Control	Baseline	Not.Aplicable	1	1	3	1	0	X	0	0	0	0	0	0	1	1	0	0	1	D	0	0	0	1	0	0	X	0	0	0	0	0	0	0	2	0	0	0	0	0	0	0	2	2
47	Observer.1	Control	30.min.Postoperative	Not.Aplicable	1	1	1	1	0	X	0	0	0	0	0	0	1	1	0	2	1	D	0	0	0	1	0	0	X	0	0	0	0	0	0	0	4	0	0	0	0	0	0	0	2	2
47	Observer.1	Control	60.min.Postoperative	Not.Aplicable	1	1	0	1	1	B	0	1	0	0	0	1	3	1	0	0	1	D	0	0	0	1	0	1	C	0	0	1	0	1	1	0	5	0	0	0	0	0	0	1	2	3
47	Observer.1	Control	90.min.Postoperative	Not.Aplicable	1	1	0	1	0	X	0	0	0	0	0	0	1	1	0	2	1	D	0	0	0	1	0	0	X	0	0	0	0	0	0	0	4	0	0	0	1	0	0	0	0	1
47	Observer.1	Control	120.min.Postoperative	Not.Aplicable	1	1	0	1	1	B	0	1	0	0	0	0	2	1	0	0	0	A	1	0	0	0	0	1	C	0	0	1	0	0	0	0	2	0	0	0	1	0	0	0	2	3
48	Observer.1	Control	Baseline	Not.Aplicable	1	1	1	1	1	B	0	1	0	0	2	0	4	1	1	2	3	BCD	0	1	1	1	0	1	C	0	0	1	0	0	2	0	10	0	3	0	1	1	1	1	2	9
48	Observer.1	Control	30.min.Postoperative	Not.Aplicable	1	1	1	1	1	B	0	1	0	0	1	0	3	1	1	2	3	BCD	0	1	1	1	0	1	C	0	0	1	0	0	0	0	8	0	3	0	1	1	0	1	2	8
48	Observer.1	Control	60.min.Postoperative	Not.Aplicable	1	1	0	1	1	B	0	1	0	0	1	0	3	1	1	2	3	BCD	0	1	1	1	0	1	C	0	0	1	0	0	0	0	8	0	2	0	1	1	1	0	2	7
48	Observer.1	Control	90.min.Postoperative	Not.Aplicable	1	1	0	1	1	B	0	1	0	0	2	0	4	1	1	2	3	BCD	0	1	1	1	0	1	C	0	0	1	0	0	0	0	8	0	3	0	0	1	0	0	2	6
48	Observer.1	Control	120.min.Postoperative	Not.Aplicable	1	1	1	1	1	B	0	1	0	0	1	0	3	1	1	2	3	BCD	0	1	1	1	0	1	C	0	0	1	0	0	1	0	9	0	0	0	1	1	1	1	2	6
49	Observer.1	Control	Baseline	Not.Aplicable	1	1	0	0	0	X	0	0	0	0	0	1	1	0	0	0	0	A	1	0	0	0	0	0	X	0	0	0	0	0	1	0	1	0	0	0	0	1	0	0	0	1
49	Observer.1	Control	30.min.Postoperative	Not.Aplicable	1	1	0	0	0	X	0	0	0	0	0	0	0	0	0	2	0	A	1	0	0	0	0	0	X	0	0	0	0	0	0	0	2	0	0	0	1	1	0	0	0	2
49	Observer.1	Control	60.min.Postoperative	Not.Aplicable	1	1	0	0	0	X	0	0	0	0	0	0	0	0	0	2	0	A	1	0	0	0	0	0	X	0	0	0	0	0	0	1	3	0	0	0	0	0	0	0	0	0
49	Observer.1	Control	90.min.Postoperative	Not.Aplicable	1	1	0	0	0	X	0	0	0	0	0	0	0	0	0	2	0	A	1	0	0	0	0	0	X	0	0	0	0	0	0	0	2	0	0	0	2	2	0	0	0	4
49	Observer.1	Control	120.min.Postoperative	Not.Aplicable	1	1	0	0	0	X	0	0	0	0	1	0	1	0	0	2	0	A	1	0	0	0	0	0	X	0	0	0	0	0	0	0	2	0	0	0	0	0	0	0	0	0
50	Observer.1	Control	Baseline	Not.Aplicable	1	1	0	0	0	X	0	0	0	0	0	0	0	0	0	0	0	A	1	0	0	0	0	0	X	0	0	0	0	0	0	1	1	0	0	0	0	0	0	1	0	1
50	Observer.1	Control	30.min.Postoperative	Not.Aplicable	1	1	1	0	0	X	0	0	0	0	0	0	0	0	0	0	0	A	1	0	0	0	0	0	X	0	0	0	0	0	0	1	1	0	0	0	0	0	0	0	0	0
50	Observer.1	Control	60.min.Postoperative	Not.Aplicable	1	1	1	0	0	X	0	0	0	0	0	0	0	0	0	0	0	A	1	0	0	0	0	0	X	0	0	0	0	0	0	1	1	0	0	0	0	0	0	0	0	0
50	Observer.1	Control	90.min.Postoperative	Not.Aplicable	1	1	0	0	0	X	0	0	0	0	0	0	0	0	0	0	0	A	1	0	0	0	0	0	X	0	0	0	0	0	0	1	1	0	0	0	0	1	0	0	0	1
50	Observer.1	Control	120.min.Postoperative	Not.Aplicable	1	1	0	0	0	X	0	0	0	0	0	0	0	0	0	0	0	A	1	0	0	0	0	0	X	0	0	0	0	0	0	1	1	0	0	0	0	0	0	0	0	0
51	Observer.1	Control	Baseline	Not.Aplicable	1	1	0	1	1	B	0	1	0	0	0	0	2	1	0	2	1	C	0	0	1	0	0	1	C	0	0	1	0	0	0	0	5	0	0	0	0	1	0	1	1	3
51	Observer.1	Control	30.min.Postoperative	Not.Aplicable	1	1	0	1	1	B	0	1	0	0	0	0	2	1	0	2	1	C	0	0	1	0	0	1	C	0	0	1	0	0	1	0	6	0	0	0	1	0	0	1	1	3
51	Observer.1	Control	60.min.Postoperative	Not.Aplicable	1	1	0	0	1	B	0	1	0	0	0	0	1	0	0	2	1	C	0	0	1	0	0	1	C	0	0	1	0	0	0	0	4	0	0	0	0	0	0	0	1	1
51	Observer.1	Control	90.min.Postoperative	Not.Aplicable	1	1	0	0	1	B	0	1	0	0	0	0	1	0	0	2	1	C	0	0	1	0	0	1	C	0	0	1	0	0	0	0	4	0	0	0	0	1	0	0	1	2
51	Observer.1	Control	120.min.Postoperative	Not.Aplicable	1	1	0	0	1	B	0	1	0	0	0	1	2	0	0	2	1	C	0	0	1	0	0	1	C	0	0	1	0	0	1	0	5	0	0	0	1	1	0	0	1	3
52	Observer.1	Control	Baseline	Not.Aplicable	1	1	0	1	0	X	0	0	0	0	0	0	1	1	1	0	1	D	0	0	0	1	0	0	X	0	0	0	0	0	0	0	3	0	3	0	0	1	0	0	2	6
52	Observer.1	Control	30.min.Postoperative	Not.Aplicable	1	1	0	1	1	B	0	1	0	0	0	1	3	1	1	0	1	D	0	0	0	1	0	1	C	0	0	1	0	0	1	0	5	0	0	0	0	1	0	1	2	4
52	Observer.1	Control	60.min.Postoperative	Not.Aplicable	1	1	0	0	0	X	0	0	0	0	0	1	1	0	1	2	1	D	0	0	0	1	0	0	X	0	0	0	0	0	1	0	5	0	0	0	0	0	0	1	2	3
52	Observer.1	Control	90.min.Postoperative	Not.Aplicable	1	1	0	0	0	X	0	0	0	0	0	1	1	0	0	2	1	D	0	0	0	1	0	0	X	0	0	0	0	0	1	0	4	0	0	0	0	1	0	1	2	4
52	Observer.1	Control	120.min.Postoperative	Not.Aplicable	1	1	0	0	1	B	0	1	0	0	0	0	1	0	0	2	1	D	0	0	0	1	0	1	C	0	0	1	0	0	0	0	4	0	0	0	0	1	0	0	0	1
1	Observer.2	Orthopedic.Surgery	Baseline	No	10	4	95	2	1	B	0	1	0	0	2	2	7	2	2	3	2	.	0	.	.	.	.	2	AC	1	0	1	0	1	0	0	12	0	4	0	1	1	1	1	4	12
1	Observer.2	Orthopedic.Surgery	60.min.Postoperative	No	7	3	54	1	1	B	0	1	0	0	1	0	3	2	1	2	1	D	0	0	0	1	0	2	AC	1	0	1	0	0	0	0	8	0	3	0	1	0	1	0	2	7
1	Observer.2	Orthopedic.Surgery	120.min.Postoperative	Yes	5	2	36	1	0	X	0	0	0	0	1	1	3	2	2	2	1	D	0	0	0	1	0	2	AC	1	0	1	0	1	0	0	10	0	2	0	0	0	0	0	1	3
1	Observer.2	Orthopedic.Surgery	180.min.Postoperative	Yes	5	2	41	1	1	B	0	1	0	0	1	0	3	1	1	2	1	C	0	0	1	0	0	2	AC	1	0	1	0	0	0	0	7	0	3	0	1	1	0	0	2	7
1	Observer.2	Orthopedic.Surgery	270.min.Postoperative	No	4	2	40	1	1	B	0	1	0	0	1	1	4	1	2	2	1	.	0	.	.	.	.	1	C	0	0	1	0	1	1	0	9	0	2	0	0	0	0	0	2	4
1	Observer.2	Orthopedic.Surgery	330.min.Postoperative	No	4	2	37	1	1	B	0	1	0	0	1	0	3	2	1	3	1	D	0	0	0	1	0	1	C	0	0	1	0	2	0	0	10	0	2	0	0	0	0	4	2	8
1	Observer.2	Orthopedic.Surgery	390.min.Postoperative	No	4	2	38	1	0	X	0	0	0	0	2	0	3	2	1	2	1	D	0	0	0	1	0	0	X	0	0	0	0	1	0	0	7	0	2	0	0	0	0	1	2	5
2	Observer.2	Orthopedic.Surgery	Baseline	No	1	1	2	0	0	X	0	0	0	0	0	0	0	0	0	0	0	A	1	0	0	0	0	0	X	0	0	0	0	0	0	0	0	0	0	0	0	0	0	0	0	0
2	Observer.2	Orthopedic.Surgery	60.min.Postoperative	Yes	8	4	82	2	2	AB	1	1	0	0	3	2	9	2	3	3	2	BC	0	1	1	0	0	2	BC	0	1	1	0	2	0	0	14	0	4	0	0	1	0	0	4	9
2	Observer.2	Orthopedic.Surgery	120.min.Postoperative	Yes	5	2	50	2	1	.	.	.	.	.	2	1	6	2	2	2	2	.	0	.	.	.	0	0	X	0	0	0	0	1	0	0	9	0	0	0	1	0	1	1	4	7
2	Observer.2	Orthopedic.Surgery	210.min.Postoperative	No	4	2	43	2	0	X	0	0	0	0	1	1	4	3	3	1	1	D	0	0	0	1	0	0	X	0	0	0	0	1	1	0	10	0	2	0	0	0	0	0	0	2
2	Observer.2	Orthopedic.Surgery	270.min.Postoperative	No	2	1	22	3	0	X	0	0	0	0	1	1	5	1	3	0	0	A	1	0	0	0	0	0	X	0	0	0	0	1	0	0	5	0	0	0	0	0	0	0	3	3
2	Observer.2	Orthopedic.Surgery	330.min.Postoperative	No	4	2	32	2	0	X	0	0	0	0	1	1	4	2	2	2	1	D	0	0	0	1	0	0	X	0	0	0	0	1	0	0	8	0	3	0	0	1	0	0	1	5
2	Observer.2	Orthopedic.Surgery	390.min.Postoperative	No	1	1	8	2	0	X	0	0	0	0	2	0	4	2	2	3	1	B	0	1	0	0	0	2	.	.	.	.	.	0	0	0	10	0	0	0	0	0	0	0	1	1
3	Observer.2	Orthopedic.Surgery	Baseline	No	1	1	2	0	0	X	0	0	0	0	0	0	0	0	0	0	0	A	1	0	0	0	0	0	X	0	0	0	0	0	0	0	0	0	0	0	0	0	0	0	0	0
3	Observer.2	Orthopedic.Surgery	60.min.Postoperative	No	1	1	1	0	0	X	0	0	0	0	1	0	1	0	1	2	1	B	0	1	0	0	0	1	C	0	0	1	0	0	0	0	5	0	0	0	0	1	1	0	1	3
3	Observer.2	Orthopedic.Surgery	120.min.Postoperative	Yes	4	2	30	1	1	B	0	1	0	0	2	1	5	1	1	2	1	B	0	1	0	0	0	1	C	0	0	1	0	1	0	0	7	0	0	0	1	1	1	4	1	8
3	Observer.2	Orthopedic.Surgery	180.min.Postoperative	Yes	6	3	52	1	1	B	0	1	0	0	3	1	6	1	1	2	1	B	0	1	0	0	0	1	C	0	0	1	0	1	0	0	7	0	3	0	0	1	0	1	3	8
3	Observer.2	Orthopedic.Surgery	270.min.Postoperative	Yes	8	4	62	1	0	X	0	0	0	0	1	2	4	1	1	2	1	B	0	1	0	0	0	0	X	0	0	0	0	2	0	0	7	0	0	0	0	1	0	4	1	6
3	Observer.2	Orthopedic.Surgery	330.min.Postoperative	No	3	1	13	1	0	X	0	0	0	0	0	0	1	0	0	2	1	.	0	.	.	.	.	0	X	0	0	0	0	0	0	0	3	0	0	0	0	0	0	0	0	0
3	Observer.2	Orthopedic.Surgery	390.min.Postoperative	No	1	1	2	1	0	X	0	0	0	0	0	1	2	1	1	0	0	A	1	0	0	0	0	0	X	0	0	0	0	1	0	0	3	0	0	0	0	0	0	1	0	1
4	Observer.2	Orthopedic.Surgery	Baseline	No	1	1	5	0	0	X	0	0	0	0	0	0	0	0	0	0	1	D	0	0	0	1	0	0	X	0	0	0	0	0	0	0	1	0	1	0	0	0	0	0	0	1
4	Observer.2	Orthopedic.Surgery	60.min.Postoperative	No	2	1	19	3	1	A	1	0	0	0	3	0	7	3	3	1	1	D	0	0	0	1	0	1	B	0	1	0	0	0	0	0	9	0	2	0	0	0	0	0	3	5
4	Observer.2	Orthopedic.Surgery	120.min.Postoperative	Yes	6	3	52	3	1	A	1	0	0	0	3	2	9	3	3	1	1	D	0	0	0	1	0	1	B	0	1	0	0	2	0	2	13	0	2	0	1	2	0	2	3	10
4	Observer.2	Orthopedic.Surgery	180.min.Postoperative	No	4	2	36	3	1	A	1	0	0	0	3	2	9	3	3	1	1	D	0	0	0	1	0	1	B	0	1	0	0	0	0	0	9	0	2	0	1	1	0	0	2	6
4	Observer.2	Orthopedic.Surgery	300.min.Postoperative	No	4	2	38	3	1	A	1	0	0	0	3	2	9	3	3	1	1	D	0	0	0	1	0	1	B	0	1	0	0	2	0	0	11	0	1	0	0	0	1	0	2	4
4	Observer.2	Orthopedic.Surgery	360.min.Postoperative	No	2	1	15	3	1	A	1	0	0	0	3	2	9	3	3	3	1	D	0	0	0	1	0	1	B	0	1	0	0	2	0	0	13	0	1	0	0	0	1	1	1	4
5	Observer.2	Orthopedic.Surgery	Baseline	No	3	2	22	3	0	X	0	0	0	0	0	2	5	0	0	0	0	A	1	0	0	0	0	0	X	0	0	0	0	2	0	0	2	0	1	0	0	0	0	1	2	4
5	Observer.2	Orthopedic.Surgery	60.min.Postoperative	Yes	3	2	30	2	0	X	0	0	0	0	1	2	5	1	1	1	1	D	0	0	0	1	0	0	X	0	0	0	0	2	1	2	9	0	1	0	0	2	1	3	3	10
5	Observer.2	Orthopedic.Surgery	120.min.Postoperative	Yes	3	2	32	3	0	X	0	0	0	0	3	2	8	3	3	1	1	D	0	0	0	1	0	1	B	0	1	0	0	2	1	2	14	0	2	0	0	1	0	3	2	8
5	Observer.2	Orthopedic.Surgery	210.min.Postoperative	No	2	1	8	0	0	X	0	0	0	0	0	0	0	0	0	0	0	A	1	0	0	0	0	0	X	0	0	0	0	0	0	0	0	0	1	0	0	0	0	0	0	1
5	Observer.2	Orthopedic.Surgery	270.min.Postoperative	No	1	1	2	0	0	X	0	0	0	0	0	2	2	0	0	0	0	A	1	0	0	0	0	0	X	0	0	0	0	1	1	0	2	0	0	0	0	0	0	0	0	0
5	Observer.2	Orthopedic.Surgery	390.min.Postoperative	No	1	1	6	0	0	X	0	0	0	0	1	2	3	0	1	0	0	A	1	0	0	0	0	0	X	0	0	0	0	1	2	0	4	0	0	0	0	0	0	0	1	1
6	Observer.2	Orthopedic.Surgery	Baseline	No	6	3	65	2	0	X	0	0	0	0	2	2	6	2	1	2	2	BC	0	1	1	0	0	0	X	0	0	0	0	2	1	0	10	0	3	0	2	1	0	0	4	10
6	Observer.2	Orthopedic.Surgery	60.min.Postoperative	No	2	1	12	0	0	X	0	0	0	0	2	2	4	2	2	3	2	BC	0	1	1	0	0	0	X	0	0	0	0	0	0	0	9	0	0	0	1	1	0	0	4	6
6	Observer.2	Orthopedic.Surgery	120.min.Postoperative	Yes	2	1	13	1	0	X	0	0	0	0	2	2	5	2	2	3	2	BC	0	1	1	0	0	0	X	0	0	0	0	2	1	0	12	0	3	0	0	0	0	2	4	9
6	Observer.2	Orthopedic.Surgery	180.min.Postoperative	No	3	2	25	2	0	X	0	0	0	0	2	2	6	2	1	3	2	BC	0	1	1	0	0	0	X	0	0	0	0	2	0	0	10	0	3	0	0	1	0	1	3	8
6	Observer.2	Orthopedic.Surgery	240.min.Postoperative	Yes	3	2	33	1	1	B	0	1	0	0	2	2	6	2	1	2	2	BC	0	1	1	0	0	1	C	0	0	1	0	2	0	0	10	0	1	0	1	2	0	1	1	6
6	Observer.2	Orthopedic.Surgery	300.min.Postoperative	No	2	1	13	1	0	X	0	0	0	0	1	2	4	2	1	1	2	BC	0	1	1	0	0	0	X	0	0	0	0	2	0	0	8	0	1	0	1	2	0	0	3	7
6	Observer.2	Orthopedic.Surgery	360.min.Postoperative	No	1	1	2	1	0	X	0	0	0	0	1	1	3	1	1	1	1	.	0	.	.	.	.	0	X	0	0	0	0	1	0	1	6	0	1	0	1	0	0	0	1	3
7	Observer.2	Orthopedic.Surgery	Baseline	No	1	1	2	0	0	X	0	0	0	0	0	0	0	0	0	0	1	D	0	0	0	1	0	0	X	0	0	0	0	0	0	0	1	0	3	0	0	0	0	0	2	5
7	Observer.2	Orthopedic.Surgery	60.min.Postoperative	No	3	2	15	1	0	X	0	0	0	0	1	0	2	1	1	2	1	C	0	0	1	0	0	0	X	0	0	0	0	0	0	0	5	0	0	0	0	1	0	0	1	2
7	Observer.2	Orthopedic.Surgery	120.min.Postoperative	No	1	1	4	0	0	X	0	0	0	0	0	0	0	0	0	0	0	A	1	0	0	0	0	0	X	0	0	0	0	0	0	0	0	0	0	0	0	1	0	0	0	1
7	Observer.2	Orthopedic.Surgery	240.min.Postoperative	No	1	1	3	1	0	X	0	0	0	0	1	0	2	0	1	2	2	BC	0	1	1	0	0	0	X	0	0	0	0	0	0	0	5	0	0	0	0	1	0	1	1	3
7	Observer.2	Orthopedic.Surgery	360.min.Postoperative	No	1	1	3	0	0	X	0	0	0	0	0	0	0	0	0	0	2	BC	0	1	1	0	0	0	X	0	0	0	0	0	0	0	2	0	0	0	0	0	0	0	0	0
8	Observer.2	Orthopedic.Surgery	Baseline	No	2	1	19	0	0	X	0	0	0	0	0	2	2	0	1	2	2	BD	0	1	0	1	0	0	X	0	0	0	0	1	0	0	6	0	0	0	0	0	0	1	2	3
8	Observer.2	Orthopedic.Surgery	60.min.Postoperative	No	1	1	9	3	1	A	1	0	0	0	3	0	7	3	3	1	1	D	0	0	0	1	0	1	B	0	1	0	0	0	0	0	9	0	2	0	1	1	0	0	4	8
8	Observer.2	Orthopedic.Surgery	120.min.Postoperative	No	3	2	26	3	1	A	1	0	0	0	3	0	7	2	3	1	1	D	0	0	0	1	0	1	B	0	1	0	0	0	0	0	8	0	1	0	0	1	0	0	0	2
8	Observer.2	Orthopedic.Surgery	180.min.Postoperative	Yes	1	1	17	2	0	X	0	0	0	0	2	1	5	2	0	0	0	A	1	0	0	0	0	0	X	0	0	0	0	1	0	0	3	0	0	0	1	0	0	0	3	4
8	Observer.2	Orthopedic.Surgery	270.min.Postoperative	No	1	1	10	1	0	X	0	0	0	0	1	1	3	0	0	0	1	D	0	0	0	1	0	0	X	0	0	0	0	1	0	0	2	0	1	0	0	0	0	1	0	2
8	Observer.2	Orthopedic.Surgery	390.min.Postoperative	No	1	1	11	2	0	X	0	0	0	0	0	1	3	2	1	0	0	A	1	0	0	0	0	0	X	0	0	0	0	1	1	0	5	0	2	0	0	0	0	1	2	5
9	Observer.2	Orthopedic.Surgery	Baseline	No	1	1	3	0	0	X	0	0	0	0	0	1	1	0	0	0	0	A	1	0	0	0	0	0	X	0	0	0	0	1	0	0	1	0	1	0	0	0	0	1	0	2
9	Observer.2	Orthopedic.Surgery	60.min.Postoperative	Yes	5	2	30	1	2	AD	1	0	0	1	1	2	6	2	1	3	1	B	0	1	0	0	0	2	AB	1	1	0	0	2	1	0	12	0	3	0	1	1	0	1	3	9
9	Observer.2	Orthopedic.Surgery	150.min.Postoperative	No	5	2	38	1	0	X	0	0	0	0	1	2	4	1	1	3	1	B	0	1	0	0	0	0	X	0	0	0	0	2	0	0	8	0	3	0	0	0	0	2	1	6
9	Observer.2	Orthopedic.Surgery	270.min.Postoperative	Yes	6	3	55	2	1	B	0	1	0	0	1	1	5	2	1	3	1	B	0	1	0	0	0	0	X	0	0	0	0	1	0	0	8	0	3	0	1	0	0	2	1	7
9	Observer.2	Orthopedic.Surgery	390.min.Postoperative	No	6	3	54	0	0	X	0	0	0	0	1	2	3	2	0	1	1	D	0	0	0	1	0	0	X	0	0	0	0	2	0	1	7	0	2	0	0	0	0	4	0	6
10	Observer.2	Orthopedic.Surgery	Baseline	No	3	2	18	1	0	X	0	0	0	0	0	1	2	0	0	0	1	D	0	0	0	1	0	0	X	0	0	0	0	1	0	0	2	0	0	0	0	0	0	1	0	1
10	Observer.2	Orthopedic.Surgery	60.min.Postoperative	Yes	6	3	50	2	0	X	0	0	0	0	3	1	6	2	1	2	1	B	0	1	0	0	0	0	X	0	0	0	0	1	1	0	8	0	3	0	0	0	0	2	2	7
10	Observer.2	Orthopedic.Surgery	150.min.Postoperative	Yes	8	4	74	2	0	X	0	0	0	0	2	1	5	2	3	2	1	B	0	1	0	0	0	0	X	0	0	0	0	1	1	1	11	0	3	0	0	0	0	2	2	7
10	Observer.2	Orthopedic.Surgery	210.min.Postoperative	No	4	2	34	0	0	X	0	0	0	0	1	1	2	0	1	2	0	A	1	0	0	0	0	0	X	0	0	0	0	1	1	1	6	0	0	0	0	0	0	2	1	3
10	Observer.2	Orthopedic.Surgery	270.min.Postoperative	No	4	2	30	3	0	X	0	0	0	0	3	1	7	3	3	2	1	D	0	0	0	1	0	0	X	0	0	0	0	1	1	1	12	1	3	0	0	0	0	2	1	7
10	Observer.2	Orthopedic.Surgery	330.min.Postoperative	No	3	2	17	1	0	X	0	0	0	0	1	1	3	1	1	2	1	D	0	0	0	1	0	0	X	0	0	0	0	1	1	1	8	0	0	0	0	0	0	2	0	2
10	Observer.2	Orthopedic.Surgery	390.min.Postoperative	No	3	2	20	1	0	X	0	0	0	0	0	1	2	1	1	2	0	A	1	0	0	0	0	0	X	0	0	0	0	1	1	0	6	0	0	0	0	0	0	1	1	2
11	Observer.2	Orthopedic.Surgery	Baseline	No	1	1	3	1	0	X	0	0	0	0	1	1	3	1	0	2	0	A	1	0	0	0	0	0	X	0	0	0	0	1	0	0	4	0	0	0	0	0	0	0	1	1
11	Observer.2	Orthopedic.Surgery	60.min.Postoperative	No	4	2	20	3	0	X	0	0	0	0	3	1	7	3	3	1	1	D	0	0	0	1	0	0	X	0	0	0	0	1	0	0	9	0	1	0	1	0	0	0	2	4
11	Observer.2	Orthopedic.Surgery	120.min.Postoperative	Yes	4	2	20	1	0	X	0	0	0	0	1	2	4	1	1	2	1	B	0	1	0	0	0	0	X	0	0	0	0	2	1	0	8	0	0	0	1	0	0	0	1	2
11	Observer.2	Orthopedic.Surgery	180.min.Postoperative	No	2	1	11	0	0	X	0	0	0	0	0	2	2	1	2	2	1	C	0	0	1	0	0	0	X	0	0	0	0	2	2	0	10	0	0	0	0	0	0	0	3	3
11	Observer.2	Orthopedic.Surgery	240.min.Postoperative	Yes	2	1	10	1	1	B	0	1	0	0	0	2	4	1	2	2	1	B	0	1	0	0	0	2	AC	1	0	1	0	2	1	2	13	0	0	0	1	1	0	2	1	5
11	Observer.2	Orthopedic.Surgery	300.min.Postoperative	No	2	1	15	1	0	X	0	0	0	0	0	0	1	1	2	2	1	B	0	1	0	0	0	0	X	0	0	0	0	0	0	0	6	0	0	0	0	0	0	0	1	1
11	Observer.2	Orthopedic.Surgery	360.min.Postoperative	No	3	1	32	1	1	B	0	1	0	0	1	1	4	1	1	2	1	B	0	1	0	0	0	1	C	0	0	1	0	1	1	0	8	0	0	0	1	1	0	0	1	3
12	Observer.2	Orthopedic.Surgery	Baseline	No	1	1	10	1	0	X	0	0	0	0	0	0	1	0	0	2	0	A	1	0	0	0	0	0	X	0	0	0	0	0	0	0	2	0	0	0	0	0	0	0	2	2
12	Observer.2	Orthopedic.Surgery	60.min.Postoperative	No	7	3	60	1	0	X	0	0	0	0	1	2	4	1	2	2	1	D	0	0	0	1	0	0	X	0	0	0	0	2	0	2	10	0	0	0	0	0	0	0	3	3
12	Observer.2	Orthopedic.Surgery	120.min.Postoperative	Yes	5	2	42	2	0	X	0	0	0	0	2	1	5	2	1	2	1	B	0	1	0	0	0	0	X	0	0	0	0	1	0	2	9	0	4	0	0	0	0	0	4	8
12	Observer.2	Orthopedic.Surgery	210.min.Postoperative	Yes	4	2	33	1	1	B	0	1	0	0	1	2	5	1	1	0	1	D	0	0	0	1	0	1	C	0	0	1	0	2	0	2	8	0	0	0	1	0	0	3	1	5
12	Observer.2	Orthopedic.Surgery	270.min.Postoperative	No	4	2	25	0	0	X	0	0	0	0	1	0	1	0	0	2	0	A	1	0	0	0	0	0	X	0	0	0	0	0	1	0	3	0	0	0	0	0	0	0	1	1
12	Observer.2	Orthopedic.Surgery	390.min.Postoperative	No	4	2	38	1	0	X	0	0	0	0	1	0	2	0	1	2	0	A	1	0	0	0	0	0	X	0	0	0	0	0	0	0	3	0	0	0	1	0	0	0	1	2
13	Observer.2	Soft.Tissue.Surgery	Baseline	No	8	3	65	2	1	B	0	1	0	0	3	2	8	2	2	2	2	BC	0	1	1	0	0	1	C	0	0	1	0	1	0	0	10	0	4	0	0	2	0	0	4	10
13	Observer.2	Soft.Tissue.Surgery	60.min.Postoperative	Yes	7	3	67	2	1	B	0	1	0	0	2	2	7	2	2	2	1	C	0	0	1	0	0	1	C	0	0	1	0	2	0	0	10	0	4	0	0	0	1	0	4	9
13	Observer.2	Soft.Tissue.Surgery	120.min.Postoperative	No	5	3	43	2	0	X	0	0	0	0	2	1	5	2	2	3	2	BC	0	1	1	0	0	1	.	.	.	.	.	1	0	0	11	0	1	0	0	1	1	0	4	7
13	Observer.2	Soft.Tissue.Surgery	180.min.Postoperative	Yes	4	2	34	2	1	B	0	1	0	0	2	0	5	2	2	3	2	BC	0	1	1	0	0	1	C	0	0	1	0	0	0	0	10	0	0	0	0	0	0	0	4	4
13	Observer.2	Soft.Tissue.Surgery	270.min.Postoperative	No	7	3	58	2	1	B	0	1	0	0	2	0	5	2	2	3	2	BC	0	1	1	0	0	1	C	0	0	1	0	0	0	0	10	0	1	0	1	0	0	0	4	6
13	Observer.2	Soft.Tissue.Surgery	330.min.Postoperative	No	6	3	63	1	1	B	0	1	0	0	2	0	4	2	2	3	2	BC	0	1	1	0	0	1	C	0	0	1	0	0	0	0	10	0	0	0	0	0	0	0	4	4
13	Observer.2	Soft.Tissue.Surgery	390.min.Postoperative	No	4	2	25	1	1	B	0	1	0	0	1	0	3	2	1	2	2	BC	0	1	1	0	0	1	C	0	0	1	0	0	1	2	11	0	0	0	1	0	0	0	4	5
14	Observer.2	Soft.Tissue.Surgery	Baseline	No	1	1	2	0	0	X	0	0	0	0	0	0	0	0	0	0	0	A	1	0	0	0	0	0	X	0	0	0	0	0	0	0	0	0	0	0	0	0	0	0	2	2
14	Observer.2	Soft.Tissue.Surgery	60.min.Postoperative	No	1	1	3	0	0	X	0	0	0	0	0	1	1	2	0	0	0	A	1	0	0	0	0	0	X	0	0	0	0	1	0	0	3	0	1	0	0	0	0	0	0	1
14	Observer.2	Soft.Tissue.Surgery	120.min.Postoperative	No	1	1	2	0	0	X	0	0	0	0	0	1	1	0	0	0	0	A	1	0	0	0	0	1	A	1	0	0	0	1	0	0	2	0	1	0	0	0	0	0	0	1
14	Observer.2	Soft.Tissue.Surgery	240.min.Postoperative	No	1	1	3	0	0	X	0	0	0	0	0	2	2	0	0	0	0	A	1	0	0	0	0	0	X	0	0	0	0	2	0	0	2	0	0	0	0	0	0	0	1	1
14	Observer.2	Soft.Tissue.Surgery	360.min.Postoperative	No	1	1	2	0	0	X	0	0	0	0	0	0	0	0	0	0	0	A	1	0	0	0	0	0	X	0	0	0	0	0	0	0	0	0	0	0	0	0	0	0	0	0
15	Observer.2	Soft.Tissue.Surgery	Baseline	No	1	1	2	0	1	B	0	1	0	0	0	0	1	2	0	0	1	B	0	1	0	0	0	0	X	0	0	0	0	0	0	0	3	0	1	0	0	0	0	0	1	2
15	Observer.2	Soft.Tissue.Surgery	60.min.Postoperative	No	1	1	2	1	1	B	0	1	0	0	1	1	4	1	1	0	1	B	0	1	0	0	0	1	C	0	0	1	0	1	0	0	5	0	3	0	1	0	1	0	3	8
15	Observer.2	Soft.Tissue.Surgery	120.min.Postoperative	No	4	2	19	1	1	B	0	1	0	0	2	2	6	1	1	0	1	B	0	1	0	0	0	1	C	0	0	1	0	1	0	0	5	0	2	0	1	0	0	0	1	4
15	Observer.2	Soft.Tissue.Surgery	180.min.Postoperative	Yes	6	3	31	3	1	B	0	1	0	0	3	1	8	3	3	1	0	A	1	0	0	0	0	1	C	0	0	1	0	1	1	0	10	0	4	0	0	1	0	0	4	9
15	Observer.2	Soft.Tissue.Surgery	240.min.Postoperative	No	3	2	16	0	0	X	0	0	0	0	0	1	1	0	0	0	0	A	1	0	0	0	0	0	X	0	0	0	0	1	1	0	2	0	1	0	1	0	0	0	1	3
15	Observer.2	Soft.Tissue.Surgery	360.min.Postoperative	No	1	1	11	0	0	X	0	0	0	0	1	1	2	1	1	0	0	A	1	0	0	0	0	0	X	0	0	0	0	1	1	0	4	0	1	0	1	0	0	0	1	3
16	Observer.2	Soft.Tissue.Surgery	Baseline	No	3	2	20	1	2	BC	0	1	1	0	1	1	5	1	0	0	0	A	1	0	0	0	0	2	CD	0	0	1	1	1	1	0	5	0	3	1	0	0	.	.	2	6
16	Observer.2	Soft.Tissue.Surgery	60.min.Postoperative	No	X	X	X	X	X	X	X	X	X	X	X	X	X	X	X	X	X	X	X	X	X	X	X	X	X	X	X	X	X	X	X	X	X	X	X	X	X	X	X	X	X	X
16	Observer.2	Soft.Tissue.Surgery	120.min.Postoperative	Yes	8	4	71	0	0	X	0	0	0	0	3	2	5	2	3	3	1	C	0	0	1	0	0	0	X	0	0	0	0	1	1	2	13	0	3	0	1	0	1	2	4	11
16	Observer.2	Soft.Tissue.Surgery	180.min.Postoperative	Yes	8	4	71	2	1	A	1	0	0	0	3	2	8	2	3	3	1	C	0	0	1	0	0	1	B	0	1	0	0	2	2	2	16	0	3	0	1	0	0	2	1	7
16	Observer.2	Soft.Tissue.Surgery	270.min.Postoperative	Yes	8	4	77	2	1	A	1	0	0	0	2	2	7	2	2	3	2	BC	0	1	1	0	0	1	B	0	1	0	0	2	2	2	16	0	1	0	1	1	.	.	1	4
16	Observer.2	Soft.Tissue.Surgery	330.min.Postoperative	Yes	6	3	73	2	1	A	1	0	0	0	2	1	6	1	3	3	2	BC	0	1	1	0	0	1	B	0	1	0	0	0	0	0	10	0	4	1	1	1	.	.	3	10
16	Observer.2	Soft.Tissue.Surgery	390.min.Postoperative	No	6	3	52	2	2	AB	1	1	0	0	2	2	8	1	2	3	2	BC	0	1	1	0	0	2	BC	0	1	1	0	0	0	0	10	.	.	.	.	.	.	.	.	.
17	Observer.2	Soft.Tissue.Surgery	Baseline	No	1	1	3	0	0	X	0	0	0	0	0	0	0	0	0	0	0	A	1	0	0	0	0	0	X	0	0	0	0	0	1	0	1	0	0	0	0	0	0	0	0	0
17	Observer.2	Soft.Tissue.Surgery	60.min.Postoperative	Yes	4	2	28	1	0	X	0	0	0	0	1	2	4	1	0	0	0	A	1	0	0	0	0	2	AC	1	0	1	0	2	2	0	7	0	3	0	0	1	0	1	1	6
17	Observer.2	Soft.Tissue.Surgery	120.min.Postoperative	Yes	2	1	15	1	1	B	0	1	0	0	1	2	5	0	1	2	1	B	0	1	0	0	0	1	C	0	0	1	0	2	2	0	9	0	0	0	1	2	0	1	1	5
17	Observer.2	Soft.Tissue.Surgery	210.min.Postoperative	No	1	1	3	0	0	X	0	0	0	0	0	1	1	0	0	0	0	A	1	0	0	0	0	0	X	0	0	0	0	1	1	0	2	0	0	0	0	2	0	1	0	3
17	Observer.2	Soft.Tissue.Surgery	270.min.Postoperative	No	1	1	3	0	1	B	0	1	0	0	1	1	3	0	1	0	1	.	0	.	.	.	.	1	C	0	0	1	0	1	1	0	5	0	3	0	0	1	0	0	1	5
17	Observer.2	Soft.Tissue.Surgery	390.min.Postoperative	No	6	3	50	2	1	B	0	1	0	0	1	2	6	2	1	2	1	C	0	0	1	0	0	1	C	0	0	1	0	2	2	0	11	0	0	0	0	1	0	2	3	6
18	Observer.2	Soft.Tissue.Surgery	Baseline	No	7	3	66	2	1	B	0	1	0	0	2	2	7	1	1	2	2	BC	0	1	1	0	0	1	C	0	0	1	0	2	0	0	9	0	3	0	2	1	1	2	1	10
18	Observer.2	Soft.Tissue.Surgery	60.min.Postoperative	No	7	3	64	1	0	X	0	0	0	0	3	2	6	3	3	1	1	D	0	0	0	1	0	0	X	0	0	0	0	2	0	0	10	1	1	0	0	0	0	2	2	6
18	Observer.2	Soft.Tissue.Surgery	120.min.Postoperative	No	3	1	17	0	1	B	0	1	0	0	0	2	3	0	0	0	0	A	1	0	0	0	0	1	C	0	0	1	0	2	0	0	3	0	1	0	1	1	0	0	1	4
18	Observer.2	Soft.Tissue.Surgery	180.min.Postoperative	No	1	1	2	0	0	X	0	0	0	0	0	1	1	0	0	0	0	A	1	0	0	0	0	0	X	0	0	0	0	1	0	0	1	0	0	0	0	0	0	0	1	1
18	Observer.2	Soft.Tissue.Surgery	300.min.Postoperative	No	3	1	18	0	1	B	0	1	0	0	0	2	3	0	1	0	1	C	0	0	1	0	0	1	C	0	0	1	0	2	0	0	5	0	1	0	0	0	0	0	1	2
18	Observer.2	Soft.Tissue.Surgery	360.min.Postoperative	No	3	1	19	0	1	B	0	1	0	0	1	2	4	0	0	2	1	B	0	1	0	0	0	1	C	0	0	1	0	2	0	0	6	0	0	0	1	0	0	0	1	2
19	Observer.2	Soft.Tissue.Surgery	Baseline	No	6	3	59	1	1	B	0	1	0	0	1	1	4	1	1	2	1	D	0	0	0	1	0	1	C	0	0	1	0	1	0	0	7	0	3	0	1	1	0	1	3	9
19	Observer.2	Soft.Tissue.Surgery	60.min.Postoperative	Yes	10	4	97	2	1	B	0	1	0	0	3	2	8	2	2	3	2	BD	0	1	0	1	0	1	B	0	1	0	0	2	1	3	16	1	3	1	1	2	0	3	4	15
19	Observer.2	Soft.Tissue.Surgery	120.min.Postoperative	No	6	3	55	1	2	AB	1	1	0	0	1	1	5	1	2	2	2	BC	0	1	1	0	0	2	BC	0	1	1	0	1	0	0	10	0	1	0	0	2	0	0	1	4
19	Observer.2	Soft.Tissue.Surgery	240.min.Postoperative	No	5	2	43	1	1	A	1	0	0	0	1	0	3	0	1	2	1	C	0	0	1	0	0	1	B	0	1	0	0	0	0	0	5	0	0	0	1	0	0	0	4	5
19	Observer.2	Soft.Tissue.Surgery	360.min.Postoperative	No	5	2	42	2	1	A	1	0	0	0	2	0	5	1	1	2	1	C	0	0	1	0	0	1	B	0	1	0	0	0	0	0	6	0	0	0	0	0	0	0	3	3
21	Observer.2	Soft.Tissue.Surgery	Baseline	No	1	1	2	0	0	X	0	0	0	0	0	0	0	0	0	0	0	A	1	0	0	0	0	0	X	0	0	0	0	0	0	0	0	0	0	0	0	0	0	0	1	1
21	Observer.2	Soft.Tissue.Surgery	60.min.Postoperative	No	1	1	2	3	0	X	0	0	0	0	3	1	7	0	3	1	1	D	0	0	0	1	0	0	X	0	0	0	0	1	0	0	6	0	2	0	0	0	0	0	2	4
21	Observer.2	Soft.Tissue.Surgery	120.min.Postoperative	No	1	1	3	0	0	X	0	0	0	0	0	1	1	0	1	0	1	D	0	0	0	1	0	0	X	0	0	0	0	1	0	0	3	0	0	0	0	0	0	1	1	2
21	Observer.2	Soft.Tissue.Surgery	240.min.Postoperative	No	1	1	12	1	0	X	0	0	0	0	1	1	3	1	1	0	0	A	1	0	0	0	0	0	X	0	0	0	0	1	0	0	3	0	0	0	0	0	0	0	1	1
21	Observer.2	Soft.Tissue.Surgery	360.min.Postoperative	No	1	1	3	0	0	X	0	0	0	0	1	1	2	0	0	2	1	B	0	1	0	0	0	0	X	0	0	0	0	1	0	0	4	0	0	0	1	0	0	0	1	2
23	Observer.2	Clinical	Baseline	Yes	10	4	95	2	1	B	0	1	0	0	2	2	7	2	2	3	2	.	0	.	.	.	.	2	AC	1	0	1	0	1	0	0	12	0	4	0	1	1	1	1	4	12
23	Observer.2	Clinical	20.min.After.Rescue.Analgesia	No	6	3	43.3	1	0	X	0	0	0	0	1	1	3	1	1	2	1	.	0	.	.	.	.	1	.	.	.	.	.	1	0	0	7	0	1	0	0	0	1	0	2	4
24	Observer.2	Clinical	Baseline	Yes	6	3	57	2	1	B	0	1	0	0	1	1	5	2	1	2	1	.	0	.	.	.	.	2	.	.	.	.	.	1	0	0	9	0	3	0	2	2	0	0	3	10
24	Observer.2	Clinical	20.min.After.Rescue.Analgesia	No	6	3	45	0	0	X	0	0	0	0	2	0	2	0	0	0	1	.	0	.	.	.	.	1	.	.	.	.	.	0	0	0	2	0	0	0	1	1	0	0	1	3
25	Observer.2	Clinical	Baseline	Yes	6	3	53	2	1	B	0	1	0	0	1	0	4	0	2	2	1	B	0	1	0	0	0	2	AC	1	0	1	0	1	0	1	9	0	0	0	1	0	0	0	1	2
25	Observer.2	Clinical	20.min.After.Rescue.Analgesia	No	4	2	15	1	0	X	0	0	0	0	0	1	2	0	0	2	0	A	1	0	0	0	0	1	.	.	.	.	.	1	0	1	5	0	0	0	0	0	0	0	0	0
26	Observer.2	Clinical	Baseline	Yes	8	3	65	2	1	B	0	1	0	0	3	2	8	2	2	2	2	BC	0	1	1	0	0	1	C	0	0	1	0	1	0	0	10	0	4	0	0	2	0	0	4	10
26	Observer.2	Clinical	20.min.After.Rescue.Analgesia	No	6	3	53	2	2	AB	1	1	0	0	2	0	6	2	2	2	2	BC	0	1	1	0	0	1	.	.	.	.	.	0	0	0	9	0	1	0	1	1	0	0	4	7
27	Observer.2	Clinical	Baseline	Yes	4	2	21	1	1	B	0	1	0	0	1	3	6	1	1	3	1	C	0	0	1	0	0	1	C	0	0	1	0	2	0	2	11	0	1	0	1	2	1	3	4	12
27	Observer.2	Clinical	20.min.After.Rescue.Analgesia	No	3	2	20	1	1	B	0	1	0	0	1	2	5	0	2	3	1	C	0	0	1	0	0	1	C	0	0	1	0	2	0	2	11	0	0	0	0	1	0	3	1	5
28	Observer.2	Clinical	Baseline	Yes	2	1	15	0	1	B	0	1	0	0	1	1	3	1	0	2	1	D	0	0	0	1	0	1	C	0	0	1	0	1	1	0	7	0	0	0	1	1	0	1	2	5
28	Observer.2	Clinical	20.min.After.Rescue.Analgesia	No	2	1	16	0	0	X	0	0	0	0	0	2	2	0	1	2	1	D	0	0	0	1	0	0	X	0	0	0	0	2	1	0	7	0	0	0	0	0	0	1	0	1
29	Observer.2	Clinical	Baseline	Yes	7	4	48	2	1	B	0	1	0	0	2	2	7	2	1	1	2	BC	0	1	1	0	0	1	C	0	0	1	0	2	1	2	12	0	4	0	1	1	0	1	3	10
29	Observer.2	Clinical	20.min.After.Rescue.Analgesia	No	5	3	34	2	2	AB	1	1	0	0	2	2	8	2	1	1	1	B	0	1	0	0	0	2	BC	0	1	1	0	2	1	2	12	0	3	0	0	1	0	1	3	8
30	Observer.2	Clinical	Baseline	Yes	6	3	43	2	1	B	0	1	0	0	2	2	7	2	2	2	2	BC	0	1	1	0	0	1	C	0	0	1	0	2	1	0	12	0	3	0	2	0	0	1	4	10
30	Observer.2	Clinical	20.min.After.Rescue.Analgesia	No	5	2	33	1	1	B	0	1	0	0	1	1	4	1	1	2	1	B	0	1	0	0	0	2	AC	1	0	1	0	1	1	0	9	0	1	0	1	0	0	1	3	6
31	Observer.2	Clinical	Baseline	Yes	1	2	31	1	1	B	0	1	0	0	1	1	4	1	1	2	2	BD	0	1	0	1	0	1	C	0	0	1	0	1	1	0	9	0	1	0	0	0	1	0	3	5
31	Observer.2	Clinical	20.min.After.Rescue.Analgesia	No	1	2	15	1	0	X	0	0	0	0	1	1	3	0	1	2	2	BD	0	1	0	1	0	0	X	0	0	0	0	0	1	0	6	0	0	0	0	0	1	0	1	2
32	Observer.2	Clinical	Baseline	Yes	4	2	35	1	1	C	0	0	1	0	1	2	5	1	3	1	1	D	0	0	0	1	0	1	D	0	0	0	1	2	0	0	9	0	0	1	0	0	0	1	1	3
32	Observer.2	Clinical	20.min.After.Rescue.Analgesia	No	3	2	16	1	0	X	0	0	0	0	1	1	3	1	0	2	0	A	1	0	0	0	0	0	X	0	0	0	0	1	0	0	4	0	0	0	0	0	0	1	1	2
33	Observer.2	Clinical	Baseline	Yes	3	2	27	1	0	X	0	0	0	0	1	1	3	0	1	2	1	D	0	0	0	1	0	0	X	0	0	0	0	1	1	0	6	0	1	0	1	0	0	1	2	5
33	Observer.2	Clinical	20.min.After.Rescue.Analgesia	No	3	2	19	0	0	X	0	0	0	0	1	1	2	0	1	2	1	D	0	0	0	1	0	0	X	0	0	0	0	1	1	1	7	0	0	0	1	0	0	1	1	3
34	Observer.2	Clinical	Baseline	Yes	7	3	60	2	1	B	0	1	0	0	3	3	9	2	2	3	2	BD	0	1	0	1	0	1	C	0	0	1	0	2	2	2	16	0	3	0	1	1	1	3	2	11
34	Observer.2	Clinical	20.min.After.Rescue.Analgesia	No	6	3	55	2	0	X	0	0	0	0	2	3	7	1	1	3	2	BD	0	1	0	1	0	0	X	0	0	0	0	2	2	0	11	0	3	0	2	0	1	2	2	10
35	Observer.2	Clinical	Baseline	Yes	7	3	64	1	1	B	0	1	0	0	2	2	6	1	2	3	3	BCD	0	1	1	1	0	1	C	0	0	1	0	2	2	2	16	0	3	0	1	1	1	4	4	14
35	Observer.2	Clinical	20.min.After.Rescue.Analgesia	No	4	2	25	0	0	X	0	0	0	0	2	2	4	0	2	2	3	BCD	0	1	1	1	0	0	X	0	0	0	0	2	2	2	13	0	0	0	0	0	1	2	1	4
36	Observer.2	Clinical	Baseline	Yes	3	2	25	1	0	X	0	0	0	0	1	2	4	0	1	1	2	DE	0	0	0	1	1	0	X	0	0	0	0	2	0	2	8	0	3	0	0	0	0	3	2	8
36	Observer.2	Clinical	20.min.After.Rescue.Analgesia	No	3	2	22	1	0	X	0	0	0	0	1	0	2	0	0	0	1	D	0	0	0	1	0	0	X	0	0	0	0	0	0	0	1	0	3	0	0	0	0	0	2	5
37	Observer.2	Clinical	Baseline	Yes	4	2	32	1	0	X	0	0	0	0	1	1	3	1	1	2	1	D	0	0	0	1	0	0	X	0	0	0	0	1	1	2	9	0	0	0	0	1	1	2	2	6
37	Observer.2	Clinical	20.min.After.Rescue.Analgesia	No	2	1	21	1	0	X	0	0	0	0	0	1	2	1	1	2	1	D	0	0	0	1	0	0	X	0	0	0	0	1	1	0	7	0	1	0	1	0	0	1	2	5
38	Observer.2	Clinical	Baseline	Yes	6	3	59	1	2	BD	0	1	0	1	1	3	7	1	1	3	1	D	0	0	0	1	0	2	AC	1	0	1	0	3	3	2	16	0	3	0	0	1	0	3	1	8
38	Observer.2	Clinical	20.min.After.Rescue.Analgesia	No	6	3	60	1	1	D	0	0	0	1	1	2	5	1	1	3	1	D	0	0	0	1	0	1	A	1	0	0	0	3	2	2	14	0	3	0	1	0	0	3	1	8
39	Observer.2	Clinical	Baseline	Yes	7	3	57	2	1	B	0	1	0	0	1	1	5	2	1	2	2	BC	0	1	1	0	0	1	C	0	0	1	0	1	1	0	10	0	3	0	1	1	1	2	3	11
39	Observer.2	Clinical	20.min.After.Rescue.Analgesia	No	5	2	45	2	0	X	0	0	0	0	0	1	3	2	1	2	2	BC	0	1	1	0	0	0	X	0	0	0	0	1	1	0	9	0	2	0	1	0	1	1	1	6
40	Observer.2	Clinical	Baseline	Yes	6	3	50	1	2	BD	0	1	0	1	1	0	4	1	1	2	1	C	0	0	1	0	0	2	AC	1	0	1	0	0	1	0	8	0	1	0	2	1	0	1	1	6
40	Observer.2	Clinical	20.min.After.Rescue.Analgesia	No	2	1	25	0	0	X	0	0	0	0	1	0	1	0	2	2	0	A	1	0	0	0	0	0	X	0	0	0	0	0	0	0	4	0	0	0	1	0	0	0	1	2
41	Observer.2	Clinical	Baseline	Yes	4	2	39	1	0	X	0	0	0	0	1	1	3	1	1	2	2	BC	0	1	1	0	0	0	X	0	0	0	0	1	1	0	8	0	1	0	1	0	0	4	1	7
41	Observer.2	Clinical	20.min.After.Rescue.Analgesia	No	1	1	9	1	0	X	0	0	0	0	1	0	2	0	1	0	2	BC	0	1	1	0	0	0	X	0	0	0	0	0	1	0	4	0	1	0	0	0	0	1	2	4
42	Observer.2	Clinical	Baseline	Yes	3	2	23	1	0	X	0	0	0	0	1	0	2	0	1	2	1	D	0	0	0	1	0	0	X	0	0	0	0	0	0	0	4	0	3	0	0	0	0	2	2	7
42	Observer.2	Clinical	20.min.After.Rescue.Analgesia	No	3	2	24	0	0	X	0	0	0	0	0	0	0	0	1	0	1	B	0	1	0	0	0	0	X	0	0	0	0	0	0	0	2	0	0	0	0	0	0	1	1	2
43	Observer.2	Control	Baseline	Not.Aplicable	1	1	3	0	0	X	0	0	0	0	0	1	1	0	0	0	1	D	0	0	0	1	0	0	X	0	0	0	0	1	1	0	3	0	1	0	0	0	0	1	2	4
43	Observer.2	Control	30.min.Postoperative	Not.Aplicable	1	1	2	0	0	X	0	0	0	0	0	2	2	0	0	0	0	A	1	0	0	0	0	0	X	0	0	0	0	3	3	0	6	0	0	0	0	0	0	4	0	4
43	Observer.2	Control	60.min.Postoperative	Not.Aplicable	1	1	3	0	0	X	0	0	0	0	0	1	1	0	0	0	0	A	1	0	0	0	0	0	X	0	0	0	0	0	1	0	1	0	1	0	0	0	0	1	0	2
43	Observer.2	Control	90.min.Postoperative	Not.Aplicable	1	1	4	0	0	X	0	0	0	0	0	3	3	0	0	0	0	A	1	0	0	0	0	0	X	0	0	0	0	2	3	0	5	0	0	0	0	0	0	4	0	4
43	Observer.2	Control	120.min.Postoperative	Not.Aplicable	1	1	3	0	1	B	0	1	0	0	0	3	4	0	0	0	0	A	1	0	0	0	0	1	C	0	0	1	0	3	3	0	7	0	.	0	1	0	0	0	1	2
44	Observer.2	Control	Baseline	Not.Aplicable	1	1	2	0	0	X	0	0	0	0	0	0	0	0	0	0	0	A	1	0	0	0	0	0	X	0	0	0	0	0	0	0	0	0	2	0	0	0	0	0	0	2
44	Observer.2	Control	30.min.Postoperative	Not.Aplicable	1	1	2	0	0	X	0	0	0	0	0	0	0	0	0	0	0	A	1	0	0	0	0	0	X	0	0	0	0	0	0	0	0	0	0	0	0	0	0	0	0	0
44	Observer.2	Control	60.min.Postoperative	Not.Aplicable	1	1	3	0	0	X	0	0	0	0	0	0	0	0	0	0	0	A	1	0	0	0	0	0	X	0	0	0	0	0	0	0	0	0	0	0	0	0	0	0	0	0
44	Observer.2	Control	90.min.Postoperative	Not.Aplicable	1	1	2	0	0	X	0	0	0	0	0	0	0	0	0	0	0	A	1	0	0	0	0	0	X	0	0	0	0	0	0	0	0	0	0	0	0	0	0	0	0	0
44	Observer.2	Control	120.min.Postoperative	Not.Aplicable	1	1	2	0	0	X	0	0	0	0	0	0	0	0	0	0	0	A	1	0	0	0	0	0	X	0	0	0	0	0	0	0	0	0	1	0	0	0	0	0	0	1
45	Observer.2	Control	Baseline	Not.Aplicable	1	1	3	2	0	X	0	0	0	0	1	3	6	1	1	3	1	E	0	0	0	0	1	0	X	0	0	0	0	3	3	3	15	0	3	0	1	1	2	4	2	13
45	Observer.2	Control	30.min.Postoperative	Not.Aplicable	1	1	3	2	0	X	0	0	0	0	1	3	6	1	1	3	1	E	0	0	0	0	1	0	X	0	0	0	0	3	3	3	15	0	3	0	1	1	2	3	2	12
45	Observer.2	Control	60.min.Postoperative	Not.Aplicable	1	1	2	2	0	X	0	0	0	0	1	3	6	1	1	3	1	E	0	0	0	0	1	0	X	0	0	0	0	3	3	3	15	0	3	0	1	0	2	3	2	11
45	Observer.2	Control	90.min.Postoperative	Not.Aplicable	1	1	2	2	0	X	0	0	0	0	1	0	3	1	1	2	1	D	0	0	0	1	0	0	X	0	0	0	0	2	2	2	11	0	3	0	1	0	1	0	2	7
45	Observer.2	Control	120.min.Postoperative	Not.Aplicable	1	1	3	2	0	X	0	0	0	0	1	2	5	1	2	2	2	DE	0	0	0	1	1	0	X	0	0	0	0	2	2	2	13	0	3	0	1	0	1	2	2	9
46	Observer.2	Control	Baseline	Not.Aplicable	1	1	10	2	0	X	0	0	0	0	2	3	7	0	1	2	1	E	0	0	0	0	1	0	X	0	0	0	0	0	1	2	7	0	3	0	1	1	2	4	2	13
46	Observer.2	Control	30.min.Postoperative	Not.Aplicable	1	1	6	2	0	X	0	0	0	0	1	0	3	1	1	2	1	E	0	0	0	0	1	0	X	0	0	0	0	0	1	3	9	0	3	0	1	0	1	4	2	11
46	Observer.2	Control	60.min.Postoperative	Not.Aplicable	1	1	4	2	0	X	0	0	0	0	1	0	3	1	1	2	1	E	0	0	0	0	1	0	X	0	0	0	0	0	1	3	9	0	3	0	2	0	2	4	2	13
46	Observer.2	Control	90.min.Postoperative	Not.Aplicable	1	1	4	2	0	X	0	0	0	0	1	0	3	1	2	2	2	DE	0	0	0	1	1	0	X	0	0	0	0	3	1	2	13	0	3	0	1	0	1	1	2	8
46	Observer.2	Control	120.min.Postoperative	Not.Aplicable	1	1	2	2	0	X	0	0	0	0	1	3	6	1	2	2	2	DE	0	0	0	1	1	0	X	0	0	0	0	3	3	3	16	0	3	0	1	0	2	2	2	10
47	Observer.2	Control	Baseline	Not.Aplicable	1	1	3	1	0	X	0	0	0	0	1	0	2	0	0	0	1	D	0	0	0	1	0	0	X	0	0	0	0	0	0	0	1	0	0	0	0	0	0	0	2	2
47	Observer.2	Control	30.min.Postoperative	Not.Aplicable	1	1	2	0	0	X	0	0	0	0	0	0	0	0	0	0	1	D	0	0	0	1	0	0	X	0	0	0	0	0	0	0	1	0	0	0	0	0	0	0	2	2
47	Observer.2	Control	60.min.Postoperative	Not.Aplicable	1	1	3	0	0	X	0	0	0	0	0	0	0	0	0	0	0	A	1	0	0	0	0	0	X	0	0	0	0	0	0	0	0	0	0	0	0	0	0	0	2	2
47	Observer.2	Control	90.min.Postoperative	Not.Aplicable	1	1	3	0	0	X	0	0	0	0	0	0	0	0	0	0	0	A	1	0	0	0	0	0	X	0	0	0	0	0	0	0	0	0	0	0	0	0	0	0	1	1
47	Observer.2	Control	120.min.Postoperative	Not.Aplicable	1	1	3	0	0	X	0	0	0	0	0	0	0	0	0	0	0	A	1	0	0	0	0	0	X	0	0	0	0	0	0	0	0	0	0	0	0	0	0	0	1	1
48	Observer.2	Control	Baseline	Not.Aplicable	1	1	3	2	0	X	0	0	0	0	1	0	3	2	2	2	2	BD	0	1	0	1	0	0	X	0	0	0	0	0	0	0	8	0	2	0	1	0	0	0	2	5
48	Observer.2	Control	30.min.Postoperative	Not.Aplicable	1	1	1	2	0	X	0	0	0	0	1	0	3	2	2	2	2	BD	0	1	0	1	0	0	X	0	0	0	0	0	0	0	8	0	2	0	0	0	1	0	2	5
48	Observer.2	Control	60.min.Postoperative	Not.Aplicable	1	1	2	2	0	X	0	0	0	0	1	0	3	2	2	2	2	BD	0	1	0	1	0	0	X	0	0	0	0	0	0	0	8	0	3	0	0	0	1	0	2	6
48	Observer.2	Control	90.min.Postoperative	Not.Aplicable	1	1	4	2	0	X	0	0	0	0	1	0	3	2	2	2	2	BD	0	1	0	1	0	0	X	0	0	0	0	0	0	0	8	0	0	0	0	1	0	0	2	3
48	Observer.2	Control	120.min.Postoperative	Not.Aplicable	1	1	1	2	0	X	0	0	0	0	1	0	3	2	1	2	1	B	0	1	0	0	0	0	X	0	0	0	0	0	0	0	6	0	2	0	1	0	0	0	1	4
49	Observer.2	Control	Baseline	Not.Aplicable	1	1	2	0	0	X	0	0	0	0	0	0	0	0	0	0	0	A	1	0	0	0	0	0	X	0	0	0	0	0	0	0	0	0	2	0	0	0	0	0	0	2
49	Observer.2	Control	30.min.Postoperative	Not.Aplicable	1	1	2	0	0	X	0	0	0	0	0	0	0	0	0	0	0	A	1	0	0	0	0	0	X	0	0	0	0	0	0	0	0	0	0	0	0	0	0	0	0	0
49	Observer.2	Control	60.min.Postoperative	Not.Aplicable	1	1	3	0	0	X	0	0	0	0	0	0	0	0	0	0	0	A	1	0	0	0	0	0	X	0	0	0	0	0	0	0	0	0	0	0	0	0	0	0	0	0
49	Observer.2	Control	90.min.Postoperative	Not.Aplicable	1	1	3	0	0	X	0	0	0	0	0	0	0	0	0	0	0	A	1	0	0	0	0	0	X	0	0	0	0	0	0	0	0	0	0	0	0	0	0	0	1	1
49	Observer.2	Control	120.min.Postoperative	Not.Aplicable	1	1	2	0	0	X	0	0	0	0	0	0	0	0	0	2	0	A	1	0	0	0	0	0	X	0	0	0	0	0	0	0	2	0	0	0	0	0	0	0	1	1
50	Observer.2	Control	Baseline	Not.Aplicable	1	1	2	0	0	X	0	0	0	0	0	0	0	0	0	0	1	D	0	0	0	1	0	0	X	0	0	0	0	0	0	0	1	0	0	0	0	0	0	0	2	2
50	Observer.2	Control	30.min.Postoperative	Not.Aplicable	1	1	3	0	0	X	0	0	0	0	0	0	0	0	0	0	0	A	1	0	0	0	0	0	X	0	0	0	0	0	0	0	0	0	0	0	0	0	0	0	0	0
50	Observer.2	Control	60.min.Postoperative	Not.Aplicable	1	1	3	0	0	X	0	0	0	0	0	0	0	0	0	0	0	A	1	0	0	0	0	0	X	0	0	0	0	0	0	0	0	0	0	0	0	0	0	0	0	0
50	Observer.2	Control	90.min.Postoperative	Not.Aplicable	1	1	2	0	0	X	0	0	0	0	0	0	0	0	0	0	0	A	1	0	0	0	0	0	X	0	0	0	0	0	0	0	0	0	0	0	1	0	0	0	0	1
50	Observer.2	Control	120.min.Postoperative	Not.Aplicable	1	1	2	0	0	X	0	0	0	0	0	0	0	0	0	0	0	A	1	0	0	0	0	0	X	0	0	0	0	0	0	0	0	0	0	0	0	0	0	0	0	0
51	Observer.2	Control	Baseline	Not.Aplicable	1	1	2	1	0	X	0	0	0	0	0	0	1	1	0	0	1	B	0	1	0	0	0	0	X	0	0	0	0	0	0	0	2	0	2	0	0	0	0	0	1	3
51	Observer.2	Control	30.min.Postoperative	Not.Aplicable	1	1	4	1	0	X	0	0	0	0	0	0	1	1	0	0	1	B	0	1	0	0	0	0	X	0	0	0	0	0	0	0	2	0	2	0	0	0	0	0	1	3
51	Observer.2	Control	60.min.Postoperative	Not.Aplicable	1	1	4	1	0	X	0	0	0	0	0	0	1	1	0	0	1	B	0	1	0	0	0	0	X	0	0	0	0	0	0	0	2	0	2	0	1	0	0	0	1	4
51	Observer.2	Control	90.min.Postoperative	Not.Aplicable	1	1	3	1	0	X	0	0	0	0	0	0	1	1	0	2	1	B	0	1	0	0	0	0	X	0	0	0	0	0	0	0	4	0	0	0	1	0	0	0	1	2
51	Observer.2	Control	120.min.Postoperative	Not.Aplicable	1	1	3	1	0	X	0	0	0	0	0	0	1	1	0	2	1	B	0	1	0	0	0	0	X	0	0	0	0	0	0	0	4	0	0	0	1	0	0	0	1	2
52	Observer.2	Control	Baseline	Not.Aplicable	1	1	3	1	0	X	0	0	0	0	0	0	1	1	0	0	1	D	0	0	0	1	0	0	X	0	0	0	0	0	0	0	2	0	2	0	0	0	0	0	2	4
52	Observer.2	Control	30.min.Postoperative	Not.Aplicable	1	1	2	1	0	X	0	0	0	0	0	0	1	1	0	0	1	D	0	0	0	1	0	0	X	0	0	0	0	0	0	0	2	0	2	0	0	0	0	0	2	4
52	Observer.2	Control	60.min.Postoperative	Not.Aplicable	1	1	2	0	0	X	0	0	0	0	0	0	0	0	0	0	1	D	0	0	0	1	0	0	X	0	0	0	0	0	0	0	1	0	0	0	0	0	0	0	1	1
52	Observer.2	Control	90.min.Postoperative	Not.Aplicable	1	1	3	0	0	X	0	0	0	0	0	0	0	0	0	0	1	D	0	0	0	1	0	0	X	0	0	0	0	0	0	0	1	0	0	0	1	0	0	0	1	2
52	Observer.2	Control	120.min.Postoperative	Not.Aplicable	1	1	2	0	0	X	0	0	0	0	0	0	0	0	0	0	1	B	0	1	0	0	0	0	X	0	0	0	0	0	0	0	1	0	0	0	1	0	0	0	1	2
1	Observer.3	Orthopedic.Surgery	Baseline	No	7	3	68	2	1	B	0	1	0	0	1	2	6	2	2	3	2	BC	0	1	1	0	0	1	C	0	0	1	0	3	0	0	13	0	4	0	1	1	1	2	4	13
1	Observer.3	Orthopedic.Surgery	60.min.Postoperative	No	5	3	53	2	1	B	0	1	0	0	1	1	5	2	1	2	1	.	0	.	.	.	.	1	C	0	0	1	0	1	0	0	8	0	3	0	1	1	1	1	2	9
1	Observer.3	Orthopedic.Surgery	120.min.Postoperative	Yes	3	3	42	2	1	B	0	1	0	0	2	2	7	2	1	2	1	.	0	.	.	.	.	1	C	0	0	1	0	1	0	0	8	0	3	0	1	2	1	1	2	10
1	Observer.3	Orthopedic.Surgery	180.min.Postoperative	Yes	3	3	45	1	0	X	0	0	0	0	1	2	4	1	1	2	1	.	0	.	.	.	.	1	C	0	0	1	0	2	0	0	8	0	3	0	0	1	0	1	2	7
1	Observer.3	Orthopedic.Surgery	270.min.Postoperative	No	3	3	45	1	1	B	0	1	0	0	0	2	4	1	1	2	0	A	1	0	0	0	0	1	C	0	0	1	0	2	0	0	7	0	3	0	0	0	1	1	2	7
1	Observer.3	Orthopedic.Surgery	330.min.Postoperative	No	3	3	44	1	0	X	0	0	0	0	0	2	3	1	1	2	0	A	1	0	0	0	0	0	X	0	0	0	0	1	0	0	5	0	0	0	1	1	1	1	2	6
1	Observer.3	Orthopedic.Surgery	390.min.Postoperative	No	5	3	55	1	0	X	0	0	0	0	1	1	3	2	1	2	1	.	0	.	.	.	.	0	X	0	0	0	0	1	0	0	7	0	3	0	0	0	0	1	2	6
2	Observer.3	Orthopedic.Surgery	Baseline	No	3	2	34	0	0	X	0	0	0	0	0	1	1	0	0	0	0	A	1	0	0	0	0	0	X	0	0	0	0	1	0	0	1	0	0	0	0	0	0	1	0	1
2	Observer.3	Orthopedic.Surgery	60.min.Postoperative	Yes	8	3	80	2	1	B	0	1	0	0	2	2	7	2	2	2	2	BC	0	1	1	0	0	1	C	0	0	1	0	1	0	2	12	0	4	0	1	2	1	1	2	11
2	Observer.3	Orthopedic.Surgery	120.min.Postoperative	Yes	5	2	53	1	0	X	0	0	0	0	1	2	4	1	2	2	2	BC	0	1	1	0	0	1	C	0	0	1	0	1	0	0	9	0	0	0	1	1	1	1	1	5
2	Observer.3	Orthopedic.Surgery	210.min.Postoperative	No	2	2	22	0	0	X	0	0	0	0	0	1	1	0	0	1	0	A	1	0	0	0	0	0	X	0	0	0	0	0	1	0	2	0	2	0	0	0	0	0	0	2
2	Observer.3	Orthopedic.Surgery	270.min.Postoperative	No	3	2	25	0	0	X	0	0	0	0	0	0	0	1	0	1	0	A	1	0	0	0	0	0	X	0	0	0	0	0	0	0	2	0	0	0	0	0	0	0	0	0
2	Observer.3	Orthopedic.Surgery	330.min.Postoperative	No	3	2	42	0	1	B	0	1	0	0	1	2	4	0	0	2	0	A	1	0	0	0	0	0	X	0	0	0	0	2	1	0	5	0	0	0	1	1	0	0	0	2
2	Observer.3	Orthopedic.Surgery	390.min.Postoperative	No	2	2	41	2	0	X	0	0	0	0	1	0	3	2	0	3	1	.	0	.	.	.	.	0	X	0	0	0	0	0	0	0	6	0	0	0	0	1	1	0	1	3
3	Observer.3	Orthopedic.Surgery	Baseline	No	2	2	8	0	0	X	0	0	0	0	0	1	1	0	0	0	0	A	1	0	0	0	0	0	X	0	0	0	0	1	0	1	2	0	0	1	0	1	0	1	1	4
3	Observer.3	Orthopedic.Surgery	60.min.Postoperative	No	1	1	18	0	0	X	0	0	0	0	1	0	1	0	0	2	1	.	0	.	.	.	.	0	X	0	0	0	0	0	0	0	3	0	0	0	0	2	0	0	1	3
3	Observer.3	Orthopedic.Surgery	120.min.Postoperative	Yes	1	1	48	0	0	X	0	0	0	0	1	3	4	0	0	2	1	.	0	.	.	.	.	1	.	.	.	.	.	2	0	2	8	0	0	0	1	1	0	4	1	7
3	Observer.3	Orthopedic.Surgery	180.min.Postoperative	Yes	2	2	21	1	1	.	.	.	.	.	1	1	4	2	1	2	1	.	0	.	.	.	.	2	.	.	.	.	.	1	0	0	9	0	3	0	1	0	0	2	1	7
3	Observer.3	Orthopedic.Surgery	270.min.Postoperative	Yes	1	1	20	1	1	.	.	.	.	.	0	3	5	1	0	2	0	A	1	0	0	0	0	0	X	0	0	0	0	3	0	0	6	0	0	0	0	1	0	4	1	6
3	Observer.3	Orthopedic.Surgery	330.min.Postoperative	No	1	1	7	0	0	X	0	0	0	0	0	0	0	0	0	2	1	.	0	.	.	.	.	0	X	0	0	0	0	0	0	0	3	0	0	0	0	1	0	1	1	3
3	Observer.3	Orthopedic.Surgery	390.min.Postoperative	No	1	1	6	0	0	X	0	0	0	0	0	1	1	0	0	0	0	A	1	0	0	0	0	0	X	0	0	0	0	1	1	0	2	0	0	0	0	1	0	1	0	2
4	Observer.3	Orthopedic.Surgery	Baseline	No	5	3	64	0	0	X	0	0	0	0	0	0	0	0	0	0	0	A	1	0	0	0	0	0	X	0	0	0	0	0	0	0	0	0	0	0	0	0	0	0	2	2
4	Observer.3	Orthopedic.Surgery	60.min.Postoperative	No	3	2	30	0	1	A	1	0	0	0	0	0	1	0	3	1	2	CD	0	0	1	1	0	1	B	0	1	0	0	0	0	0	7	0	1	0	1	1	1	0	0	4
4	Observer.3	Orthopedic.Surgery	120.min.Postoperative	Yes	5	2	72	3	1	A	1	0	0	0	3	2	9	3	3	1	1	C	0	0	1	0	0	1	B	0	1	0	0	1	0	0	10	0	2	1	1	0	1	1	0	6
4	Observer.3	Orthopedic.Surgery	180.min.Postoperative	No	3	2	65	2	1	A	1	0	0	0	0	0	3	3	3	1	0	A	1	0	0	0	0	1	B	0	1	0	0	0	0	0	8	0	2	1	0	1	1	0	0	5
4	Observer.3	Orthopedic.Surgery	300.min.Postoperative	No	3	2	52	3	0	X	0	0	0	0	0	0	3	1	3	1	0	A	1	0	0	0	0	1	B	0	1	0	0	0	0	0	6	0	2	0	1	0	1	0	0	4
4	Observer.3	Orthopedic.Surgery	360.min.Postoperative	No	4	2	53	3	1	A	1	0	0	0	0	2	6	1	3	1	1	B	0	1	0	0	0	1	B	0	1	0	0	0	0	0	7	0	2	0	1	1	1	1	0	6
5	Observer.3	Orthopedic.Surgery	Baseline	No	5	3	54	0	0	X	0	0	0	0	0	1	1	0	0	0	0	A	1	0	0	0	0	0	X	0	0	0	0	1	1	1	3	0	0	0	0	1	0	1	2	4
5	Observer.3	Orthopedic.Surgery	60.min.Postoperative	Yes	2	1	12	0	0	X	0	0	0	0	3	3	6	0	3	1	1	B	0	1	0	0	0	0	X	0	0	0	0	1	1	3	10	0	0	0	0	0	2	3	1	6
5	Observer.3	Orthopedic.Surgery	120.min.Postoperative	Yes	4	2	35	3	0	X	0	0	0	0	1	2	6	3	0	1	1	B	0	1	0	0	0	0	X	0	0	0	0	1	1	3	10	0	2	0	0	2	0	3	0	7
5	Observer.3	Orthopedic.Surgery	210.min.Postoperative	No	2	1	15	0	0	X	0	0	0	0	0	0	0	0	0	0	0	A	1	0	0	0	0	0	X	0	0	0	0	0	0	0	0	0	0	0	0	1	0	1	0	2
5	Observer.3	Orthopedic.Surgery	270.min.Postoperative	No	2	1	6	0	0	X	0	0	0	0	0	0	0	0	0	0	0	A	1	0	0	0	0	0	X	0	0	0	0	1	0	0	1	0	0	0	1	1	0	0	0	2
5	Observer.3	Orthopedic.Surgery	390.min.Postoperative	No	2	1	6	0	0	X	0	0	0	0	0	2	2	0	0	0	0	A	1	0	0	0	0	0	X	0	0	0	0	1	1	0	2	0	0	0	1	1	0	1	1	4
6	Observer.3	Orthopedic.Surgery	Baseline	No	6	2	62	2	2	BC	0	1	1	0	1	1	6	2	1	2	1	B	0	1	0	0	0	1	C	0	0	1	0	2	1	0	10	0	3	1	1	0	0	1	1	7
6	Observer.3	Orthopedic.Surgery	60.min.Postoperative	No	3	2	13	1	0	X	0	0	0	0	1	2	4	1	1	3	2	BC	0	1	1	0	0	0	X	0	0	0	0	1	1	0	9	0	4	0	1	1	1	0	1	8
6	Observer.3	Orthopedic.Surgery	120.min.Postoperative	Yes	2	2	13	0	1	B	0	1	0	0	2	2	5	1	0	3	1	B	0	1	0	0	0	1	C	0	0	1	0	1	1	0	8	0	1	0	0	1	0	0	1	3
6	Observer.3	Orthopedic.Surgery	180.min.Postoperative	No	2	1	10	0	0	X	0	0	0	0	1	2	3	1	1	3	0	A	1	0	0	0	0	0	X	0	0	0	0	2	2	0	9	0	1	0	0	0	1	1	1	4
6	Observer.3	Orthopedic.Surgery	240.min.Postoperative	Yes	3	2	25	1	0	X	0	0	0	0	0	2	3	1	0	2	0	A	1	0	0	0	0	1	D	0	0	0	1	2	0	0	6	0	1	0	1	1	0	1	1	5
6	Observer.3	Orthopedic.Surgery	300.min.Postoperative	No	2	1	23	0	1	C	0	0	1	0	1	2	4	0	1	3	0	A	1	0	0	0	0	0	X	0	0	0	0	2	1	0	7	0	1	0	1	1	0	1	1	5
6	Observer.3	Orthopedic.Surgery	360.min.Postoperative	No	2	1	22	0	0	X	0	0	0	0	0	2	2	0	0	2	0	A	1	0	0	0	0	0	X	0	0	0	0	1	0	0	3	0	0	0	0	1	0	1	1	3
7	Observer.3	Orthopedic.Surgery	Baseline	No	4	2	31	0	0	X	0	0	0	0	0	2	2	0	0	0	0	A	1	0	0	0	0	0	X	0	0	0	0	0	2	0	2	0	0	0	0	0	0	0	1	1
7	Observer.3	Orthopedic.Surgery	60.min.Postoperative	No	2	1	33	0	0	X	0	0	0	0	0	1	1	0	0	2	0	A	1	0	0	0	0	0	X	0	0	0	0	1	0	0	3	0	0	0	0	0	0	0	1	1
7	Observer.3	Orthopedic.Surgery	120.min.Postoperative	No	2	1	28	0	0	X	0	0	0	0	0	0	0	0	0	3	0	A	1	0	0	0	0	0	X	0	0	0	0	0	0	0	3	0	0	0	0	0	0	1	1	2
7	Observer.3	Orthopedic.Surgery	240.min.Postoperative	No	4	2	54	1	0	X	0	0	0	0	0	0	1	1	1	3	0	A	1	0	0	0	0	0	X	0	0	0	0	0	0	0	5	0	0	0	1	1	1	0	1	4
7	Observer.3	Orthopedic.Surgery	360.min.Postoperative	No	2	1	42	0	0	X	0	0	0	0	0	0	0	0	0	2	0	A	1	0	0	0	0	0	X	0	0	0	0	0	0	0	2	0	0	0	0	0	0	0	1	1
8	Observer.3	Orthopedic.Surgery	Baseline	No	4	2	40	0	0	X	0	0	0	0	0	2	2	0	0	0	0	A	1	0	0	0	0	0	X	0	0	0	0	2	0	0	2	0	0	1	0	1	0	1	0	3
8	Observer.3	Orthopedic.Surgery	60.min.Postoperative	No	2	1	10	3	0	X	0	0	0	0	0	0	3	0	1	1	1	D	0	0	0	1	0	0	X	0	0	0	0	0	0	0	3	0	2	0	0	0	1	0	1	4
8	Observer.3	Orthopedic.Surgery	120.min.Postoperative	No	2	1	7	0	0	X	0	0	0	0	0	0	0	0	3	0	1	B	0	1	0	0	0	0	X	0	0	0	0	0	0	0	4	0	0	0	0	1	1	0	1	3
8	Observer.3	Orthopedic.Surgery	180.min.Postoperative	Yes	4	3	35	2	0	X	0	0	0	0	1	1	4	2	1	0	1	B	0	1	0	0	0	0	X	0	0	0	0	1	0	0	5	0	3	0	0	1	1	1	1	7
8	Observer.3	Orthopedic.Surgery	270.min.Postoperative	No	2	1	20	0	0	X	0	0	0	0	0	1	1	1	0	0	0	A	1	0	0	0	0	0	X	0	0	0	0	1	0	0	2	0	0	0	0	1	1	0	0	2
8	Observer.3	Orthopedic.Surgery	390.min.Postoperative	No	4	2	51	2	0	X	0	0	0	0	3	0	5	0	3	0	0	A	1	0	0	0	0	0	X	0	0	0	0	0	0	0	3	0	2	.	1	1	1	0	2	7
9	Observer.3	Orthopedic.Surgery	Baseline	No	6	3	65	1	0	X	0	0	0	0	0	3	4	1	0	0	1	B	0	1	0	0	0	0	X	0	0	0	0	3	0	0	5	0	0	1	1	1	1	1	1	6
9	Observer.3	Orthopedic.Surgery	60.min.Postoperative	Yes	7	3	77	3	1	A	1	0	0	0	1	1	6	3	1	3	1	B	0	1	0	0	0	1	A	1	0	0	0	1	0	2	12	0	4	0	1	1	1	1	1	9
9	Observer.3	Orthopedic.Surgery	150.min.Postoperative	No	6	3	71	1	0	X	0	0	0	0	1	2	4	1	1	2	0	A	1	0	0	0	0	1	B	0	1	0	0	2	1	1	9	0	3	0	0	1	0	4	1	9
9	Observer.3	Orthopedic.Surgery	270.min.Postoperative	Yes	7	3	69	2	1	C	0	0	1	0	1	1	5	2	0	2	0	A	1	0	0	0	0	1	C	0	0	1	0	1	3	0	9	0	3	0	0	1	0	1	1	6
9	Observer.3	Orthopedic.Surgery	390.min.Postoperative	No	5	2	52	1	0	X	0	0	0	0	0	1	2	0	0	0	0	A	1	0	0	0	0	0	X	0	0	0	0	1	0	0	1	0	0	1	1	1	0	1	0	4
10	Observer.3	Orthopedic.Surgery	Baseline	No	4	2	41	1	1	A	1	0	0	0	0	2	4	1	0	2	0	A	1	0	0	0	0	1	B	0	1	0	0	2	0	0	6	0	0	0	0	0	0	2	1	3
10	Observer.3	Orthopedic.Surgery	60.min.Postoperative	Yes	6	3	73	1	1	A	1	0	0	0	0	2	4	1	1	3	0	A	1	0	0	0	0	1	B	0	1	0	0	2	0	1	9	0	2	0	0	0	1	2	1	6
10	Observer.3	Orthopedic.Surgery	150.min.Postoperative	Yes	7	3	73	1	1	A	1	0	0	0	0	3	5	1	1	3	1	D	0	0	0	1	0	1	B	0	1	0	0	3	0	2	12	0	2	1	0	1	0	2	1	7
10	Observer.3	Orthopedic.Surgery	210.min.Postoperative	No	3	2	29	0	0	X	0	0	0	0	0	1	1	0	0	3	0	A	1	0	0	0	0	0	X	0	0	0	0	1	0	0	4	0	0	0	0	0	0	2	1	3
10	Observer.3	Orthopedic.Surgery	270.min.Postoperative	No	5	3	70	3	1	A	1	0	0	0	0	2	6	3	1	1	1	D	0	0	0	1	0	1	B	0	1	0	0	2	0	3	12	1	2	1	0	0	0	2	1	7
10	Observer.3	Orthopedic.Surgery	330.min.Postoperative	No	3	2	54	0	0	X	0	0	0	0	0	1	1	0	0	1	0	A	1	0	0	0	0	0	X	0	0	0	0	1	1	0	3	0	0	0	0	0	0	1	0	1
10	Observer.3	Orthopedic.Surgery	390.min.Postoperative	No	3	2	43	0	0	X	0	0	0	0	1	0	1	0	0	2	0	A	1	0	0	0	0	0	X	0	0	0	0	1	0	0	3	0	0	0	0	0	0	0	0	0
11	Observer.3	Orthopedic.Surgery	Baseline	No	3	2	39	0	0	X	0	0	0	0	1	0	1	0	0	2	1	B	0	1	0	0	0	1	C	0	0	1	0	0	0	0	4	0	0	0	1	0	0	0	1	2
11	Observer.3	Orthopedic.Surgery	60.min.Postoperative	No	3	2	30	2	0	X	0	0	0	0	3	1	6	3	0	1	0	A	1	0	0	0	0	0	X	0	0	0	0	1	0	0	5	0	0	0	1	0	1	0	1	3
11	Observer.3	Orthopedic.Surgery	120.min.Postoperative	Yes	5	2	45	0	0	X	0	0	0	0	0	1	1	1	0	2	1	B	0	1	0	0	0	0	X	0	0	0	0	1	1	0	6	0	0	0	0	0	1	0	1	2
11	Observer.3	Orthopedic.Surgery	180.min.Postoperative	No	4	2	38	0	0	X	0	0	0	0	1	3	4	0	1	2	1	B	0	1	0	0	0	0	X	0	0	0	0	2	1	0	7	0	0	0	0	0	0	4	1	5
11	Observer.3	Orthopedic.Surgery	240.min.Postoperative	Yes	6	3	63	1	1	B	0	1	0	0	1	2	5	1	2	2	2	DE	0	0	0	1	1	1	C	0	0	1	0	2	1	2	13	0	1	0	1	0	0	4	1	7
11	Observer.3	Orthopedic.Surgery	300.min.Postoperative	No	3	2	57	1	0	X	0	0	0	0	0	0	1	1	1	2	1	B	0	1	0	0	0	1	B	0	1	0	0	0	0	0	6	0	1	0	0	0	1	0	1	3
11	Observer.3	Orthopedic.Surgery	360.min.Postoperative	No	3	2	55	1	1	A	1	0	0	0	0	2	4	1	1	2	1	B	0	1	0	0	0	1	B	0	1	0	0	1	1	0	8	0	3	0	1	1	0	1	1	7
12	Observer.3	Orthopedic.Surgery	Baseline	No	4	2	40	0	0	X	0	0	0	0	0	1	1	0	0	2	0	A	1	0	0	0	0	0	X	0	0	0	0	1	0	0	3	0	0	0	0	0	0	0	1	1
12	Observer.3	Orthopedic.Surgery	60.min.Postoperative	No	6	3	68	1	0	X	0	0	0	0	0	0	1	1	1	2	1	B	0	1	0	0	0	0	X	0	0	0	0	0	0	0	5	0	3	1	0	0	1	1	1	7
12	Observer.3	Orthopedic.Surgery	120.min.Postoperative	Yes	5	2	32	0	1	B	0	1	0	0	2	1	4	0	0	2	1	B	0	1	0	0	0	1	C	0	0	1	0	1	0	0	5	0	0	0	1	0	1	1	1	4
12	Observer.3	Orthopedic.Surgery	210.min.Postoperative	Yes	5	2	53	1	1	B	0	1	0	0	1	2	5	1	1	2	1	B	0	1	0	0	0	1	C	0	0	1	0	2	0	2	10	0	2	0	0	1	1	3	1	8
12	Observer.3	Orthopedic.Surgery	270.min.Postoperative	No	6	2	63	2	0	X	0	0	0	0	1	1	4	2	1	3	1	D	0	0	0	1	0	0	X	0	0	0	0	1	1	0	9	0	4	0	0	1	0	0	2	7
12	Observer.3	Orthopedic.Surgery	390.min.Postoperative	No	4	2	52	0	0	X	0	0	0	0	0	0	0	0	0	2	0	A	1	0	0	0	0	0	X	0	0	0	0	0	0	0	2	0	0	0	1	0	0	0	1	2
13	Observer.3	Soft.Tissue.Surgery	Baseline	No	6	3	69	2	2	AB	1	1	0	0	1	1	6	2	1	2	1	.	0	.	.	.	.	1	C	0	0	1	0	1	0	0	8	0	4	0	1	2	0	1	1	9
13	Observer.3	Soft.Tissue.Surgery	60.min.Postoperative	Yes	6	3	80	2	1	B	0	1	0	0	1	2	6	2	2	3	1	.	0	.	.	.	.	1	C	0	0	1	0	1	0	0	10	0	3	0	1	1	1	1	1	8
13	Observer.3	Soft.Tissue.Surgery	120.min.Postoperative	No	5	2	57	0	0	X	0	0	0	0	1	2	3	0	2	3	2	BC	0	1	1	0	0	0	X	0	0	0	0	1	0	2	10	0	0	0	1	1	1	1	3	7
13	Observer.3	Soft.Tissue.Surgery	180.min.Postoperative	Yes	3	1	71	1	1	B	0	1	0	0	2	2	6	0	2	3	2	BC	0	1	1	0	0	0	X	0	0	0	0	1	0	0	8	0	0	0	2	2	0	0	1	5
13	Observer.3	Soft.Tissue.Surgery	270.min.Postoperative	No	3	1	44	1	1	B	0	1	0	0	1	1	4	1	1	2	1	.	0	.	.	.	.	0	X	0	0	0	0	1	0	0	6	0	0	0	1	2	0	0	1	4
13	Observer.3	Soft.Tissue.Surgery	330.min.Postoperative	No	4	1	64	2	1	B	0	1	0	0	1	0	4	2	2	2	2	BC	0	1	1	0	0	1	C	0	0	1	0	0	0	0	9	0	3	0	1	1	1	1	1	8
13	Observer.3	Soft.Tissue.Surgery	390.min.Postoperative	No	6	1	50	1	1	B	0	1	0	0	1	0	3	1	1	2	1	.	0	.	.	.	.	1	C	0	0	1	0	0	3	2	11	0	3	0	2	1	0	0	1	7
14	Observer.3	Soft.Tissue.Surgery	Baseline	No	1	1	3	0	0	X	0	0	0	0	0	0	0	0	0	0	0	A	1	0	0	0	0	0	X	0	0	0	0	0	1	0	1	0	0	0	0	0	0	0	1	1
14	Observer.3	Soft.Tissue.Surgery	60.min.Postoperative	No	1	1	3	0	0	X	0	0	0	0	0	0	0	0	0	0	0	A	1	0	0	0	0	0	X	0	0	0	0	1	1	0	2	0	0	0	0	0	0	0	0	0
14	Observer.3	Soft.Tissue.Surgery	120.min.Postoperative	No	1	1	3	0	0	X	0	0	0	0	0	1	1	0	0	0	0	A	1	0	0	0	0	0	X	0	0	0	0	1	0	0	1	0	0	0	0	0	0	0	1	1
14	Observer.3	Soft.Tissue.Surgery	240.min.Postoperative	No	1	1	4	0	0	X	0	0	0	0	0	1	1	0	0	0	0	A	1	0	0	0	0	0	X	0	0	0	0	1	0	0	1	0	0	0	0	0	0	0	1	1
14	Observer.3	Soft.Tissue.Surgery	360.min.Postoperative	No	1	1	5	0	0	X	0	0	0	0	0	0	0	0	0	0	0	A	1	0	0	0	0	0	X	0	0	0	0	1	0	0	1	0	0	0	1	1	0	0	1	3
15	Observer.3	Soft.Tissue.Surgery	Baseline	No	1	1	2	1	0	X	0	0	0	0	1	0	2	1	1	2	0	A	1	0	0	0	0	1	.	.	.	.	.	0	0	0	5	0	2	0	1	0	1	0	1	5
15	Observer.3	Soft.Tissue.Surgery	60.min.Postoperative	No	1	1	3	0	0	X	0	0	0	0	1	0	1	0	0	2	0	A	1	0	0	0	0	0	X	0	0	0	0	0	0	0	2	0	1	0	1	2	0	0	1	5
15	Observer.3	Soft.Tissue.Surgery	120.min.Postoperative	No	2	2	35	1	0	X	0	0	0	0	1	0	2	1	1	2	1	.	0	.	.	.	.	1	C	0	0	1	0	0	0	0	6	0	3	0	1	2	0	0	1	7
15	Observer.3	Soft.Tissue.Surgery	180.min.Postoperative	Yes	2	2	32	2	0	X	0	0	0	0	0	2	4	3	0	1	0	A	1	0	0	0	0	1	B	0	1	0	0	1	2	0	8	0	2	0	0	2	0	1	0	5
15	Observer.3	Soft.Tissue.Surgery	240.min.Postoperative	No	2	2	9	0	0	X	0	0	0	0	0	2	2	0	0	1	0	A	1	0	0	0	0	0	X	0	0	0	0	1	1	0	3	0	0	0	1	2	1	1	1	6
15	Observer.3	Soft.Tissue.Surgery	360.min.Postoperative	No	1	1	22	0	0	X	0	0	0	0	0	2	2	0	0	1	1	.	0	.	.	.	.	0	X	0	0	0	0	3	2	0	7	0	0	0	1	1	1	1	1	5
16	Observer.3	Soft.Tissue.Surgery	Baseline	No	3	2	32	0	1	B	0	1	0	0	0	2	3	1	0	1	0	A	1	0	0	0	0	1	C	0	0	1	0	1	0	0	4	0	0	1	0	0	0	1	1	3
16	Observer.3	Soft.Tissue.Surgery	60.min.Postoperative	No	X	X	X	X	X	X	X	X	X	X	X	X	X	X	X	X	X	X	X	X	X	X	X	X	X	X	X	X	X	X	X	X	X	X	X	X	X	X	X	X	X	X
16	Observer.3	Soft.Tissue.Surgery	120.min.Postoperative	Yes	6	3	88	2	0	X	0	0	0	0	2	2	6	2	2	2	1	B	0	1	0	0	0	1	B	0	1	0	0	1	1	1	11	0	3	0	1	2	1	0	3	10
16	Observer.3	Soft.Tissue.Surgery	180.min.Postoperative	Yes	8	3	75	2	1	A	1	0	0	0	1	2	6	2	2	3	2	BC	0	1	1	0	0	1	B	0	1	0	0	2	2	2	16	0	1	0	2	2	1	2	1	9
16	Observer.3	Soft.Tissue.Surgery	270.min.Postoperative	Yes	7	3	64	1	0	X	0	0	0	0	0	2	3	1	1	3	1	B	0	1	0	0	0	1	B	0	1	0	0	3	2	3	15	0	1	0	0	1	1	2	1	6
16	Observer.3	Soft.Tissue.Surgery	330.min.Postoperative	Yes	5	2	50	2	1	A	1	0	0	0	1	2	6	2	2	3	1	B	0	1	0	0	0	1	B	0	1	0	0	0	0	0	9	0	1	1	1	2	1	1	1	8
16	Observer.3	Soft.Tissue.Surgery	390.min.Postoperative	No	4	2	48	1	1	A	1	0	0	0	1	1	4	1	1	2	1	B	0	1	0	0	0	0	X	0	0	0	0	1	0	0	6	0	2	0	0	0	1	1	1	5
17	Observer.3	Soft.Tissue.Surgery	Baseline	No	1	1	9	0	0	X	0	0	0	0	1	2	3	0	0	0	0	A	1	0	0	0	0	0	X	0	0	0	0	0	0	0	0	0	0	0	0	0	0	1	1	2
17	Observer.3	Soft.Tissue.Surgery	60.min.Postoperative	Yes	1	1	2	0	0	X	0	0	0	0	0	2	2	0	0	0	0	A	1	0	0	0	0	1	C	0	0	1	0	1	2	0	4	0	0	0	0	1	0	1	1	3
17	Observer.3	Soft.Tissue.Surgery	120.min.Postoperative	Yes	1	1	2	0	0	X	0	0	0	0	0	2	2	0	0	2	0	A	1	0	0	0	0	0	X	0	0	0	0	2	2	0	6	0	0	0	0	1	0	1	1	3
17	Observer.3	Soft.Tissue.Surgery	210.min.Postoperative	No	1	1	2	0	0	X	0	0	0	0	0	1	1	0	0	0	0	A	1	0	0	0	0	0	X	0	0	0	0	2	2	0	4	0	0	0	0	0	0	1	0	1
17	Observer.3	Soft.Tissue.Surgery	270.min.Postoperative	No	1	1	2	0	0	X	0	0	0	0	0	1	1	0	0	0	0	A	1	0	0	0	0	0	X	0	0	0	0	1	1	0	2	0	0	0	0	0	0	1	1	2
17	Observer.3	Soft.Tissue.Surgery	390.min.Postoperative	No	3	2	22	1	0	X	0	0	0	0	0	2	3	1	0	2	0	A	1	0	0	0	0	1	B	0	1	0	0	2	2	0	8	0	0	0	0	1	0	1	1	3
18	Observer.3	Soft.Tissue.Surgery	Baseline	No	5	2	67	1	1	B	0	1	0	0	0	2	4	1	1	2	1	B	0	1	0	0	0	1	C	0	0	1	0	2	0	0	8	0	0	1	1	1	0	2	1	6
18	Observer.3	Soft.Tissue.Surgery	60.min.Postoperative	No	3	2	43	3	0	X	0	0	0	0	0	2	5	0	0	1	0	A	1	0	0	0	0	0	X	0	0	0	0	1	0	0	2	0	2	0	0	0	0	1	2	5
18	Observer.3	Soft.Tissue.Surgery	120.min.Postoperative	No	4	2	54	0	0	X	0	0	0	0	1	1	2	0	1	2	0	A	1	0	0	0	0	0	X	0	0	0	0	0	0	0	3	0	0	0	0	0	0	0	1	1
18	Observer.3	Soft.Tissue.Surgery	180.min.Postoperative	No	3	2	33	0	0	X	0	0	0	0	0	2	2	0	0	0	0	A	1	0	0	0	0	0	X	0	0	0	0	2	0	0	2	0	0	0	0	0	0	1	0	1
18	Observer.3	Soft.Tissue.Surgery	300.min.Postoperative	No	.	.	.	.	.	.	.	.	.	.	.	.	.	.	.	.	.	.	.	.	.	.	.	.	.	.	.	.	.	.	.	.	.	.	.	.	.	.	.	.	.	.
18	Observer.3	Soft.Tissue.Surgery	360.min.Postoperative	No	4	2	45	0	1	B	0	1	0	0	1	2	4	0	0	2	0	A	1	0	0	0	0	1	C	0	0	1	0	2	0	0	5	0	0	0	0	0	0	1	1	2
19	Observer.3	Soft.Tissue.Surgery	Baseline	No	4	2	25	1	0	X	0	0	0	0	1	1	3	1	1	2	1	B	0	1	0	0	0	0	X	0	0	0	0	1	0	0	6	0	1	0	1	1	1	0	1	5
19	Observer.3	Soft.Tissue.Surgery	60.min.Postoperative	Yes	7	3	65	3	1	A	1	0	0	0	3	2	9	3	3	1	1	D	0	0	0	1	0	1	B	0	1	0	0	2	0	3	14	1	2	0	2	1	1	3	4	14
19	Observer.3	Soft.Tissue.Surgery	120.min.Postoperative	No	4	2	46	2	0	X	0	0	0	0	1	2	5	2	1	2	1	B	0	1	0	0	0	0	X	0	0	0	0	2	0	0	8	0	0	0	1	0	1	1	1	4
19	Observer.3	Soft.Tissue.Surgery	240.min.Postoperative	No	3	2	29	0	0	X	0	0	0	0	1	0	1	0	0	2	1	B	0	1	0	0	0	0	X	0	0	0	0	0	0	0	3	0	0	0	0	0	0	0	1	1
19	Observer.3	Soft.Tissue.Surgery	360.min.Postoperative	No	3	2	30	0	1	B	0	1	0	0	1	0	2	0	0	2	1	B	0	1	0	0	0	1	C	0	0	1	0	0	0	0	4	0	0	0	.	.	1	0	1	2
21	Observer.3	Soft.Tissue.Surgery	Baseline	No	1	1	1	0	0	X	0	0	0	0	0	0	0	0	0	2	1	B	0	1	0	0	0	0	X	0	0	0	0	0	0	0	3	0	0	0	0	0	0	0	1	1
21	Observer.3	Soft.Tissue.Surgery	60.min.Postoperative	No	1	1	1	0	0	X	0	0	0	0	3	0	3	0	3	1	1	BC	0	1	1	0	0	0	X	0	0	0	0	0	0	0	5	0	0	0	0	0	1	0	0	1
21	Observer.3	Soft.Tissue.Surgery	120.min.Postoperative	No	1	1	0	0	0	X	0	0	0	0	0	0	0	0	1	2	0	A	1	0	0	0	0	0	X	0	0	0	0	0	0	0	3	0	1	0	0	0	1	0	0	2
21	Observer.3	Soft.Tissue.Surgery	240.min.Postoperative	No	2	2	20	0	0	X	0	0	0	0	0	0	0	0	1	1	0	A	1	0	0	0	0	0	X	0	0	0	0	0	0	0	2	0	1	0	0	0	1	0	1	3
21	Observer.3	Soft.Tissue.Surgery	360.min.Postoperative	No	6	3	44	1	1	B	0	1	0	0	1	0	3	1	1	2	0	A	1	0	0	0	0	1	C	0	0	1	0	0	0	0	5	0	3	0	0	1	0	0	1	5
23	Observer.3	Clinical	Baseline	Yes	7	3	68	2	1	B	0	1	0	0	1	2	6	2	2	3	2	BC	0	1	1	0	0	1	C	0	0	1	0	3	0	0	13	0	4	0	1	1	1	2	4	13
23	Observer.3	Clinical	20.min.After.Rescue.Analgesia	No	4	2	43	2	1	B	0	1	0	0	1	2	6	1	1	2	0	A	1	0	0	0	0	1	C	0	0	1	0	2	0	0	7	0	3	0	1	0	0	1	2	7
24	Observer.3	Clinical	Baseline	Yes	7	3	76	2	1	B	0	1	0	0	1	1	5	2	1	2	0	A	1	0	0	0	0	1	C	0	0	1	0	1	0	0	7	0	4	0	2	2	0	1	1	10
24	Observer.3	Clinical	20.min.After.Rescue.Analgesia	No	5	2	59	2	0	X	0	0	0	0	1	0	3	0	1	2	1	.	0	.	.	.	.	1	C	0	0	1	0	0	0	0	5	0	0	0	1	0	0	0	1	2
25	Observer.3	Clinical	Baseline	Yes	6	3	39	0	0	X	0	0	0	0	1	1	2	0	0	0	0	A	1	0	0	0	0	0	X	0	0	0	0	1	1	0	2	0	0	0	1	2	0	1	1	5
25	Observer.3	Clinical	20.min.After.Rescue.Analgesia	No	2	1	16	0	0	X	0	0	0	0	0	0	0	0	0	0	0	A	1	0	0	0	0	0	X	0	0	0	0	0	1	0	1	0	0	0	0	0	0	0	2	2
26	Observer.3	Clinical	Baseline	Yes	6	3	69	2	2	AB	1	1	0	0	1	1	6	2	1	2	1	.	0	.	.	.	.	1	C	0	0	1	0	1	0	0	8	0	4	0	1	2	0	1	1	9
26	Observer.3	Clinical	20.min.After.Rescue.Analgesia	No	5	3	53	2	1	B	0	1	0	0	1	0	4	2	1	2	1	.	0	.	.	.	.	1	C	0	0	1	0	0	1	0	8	0	3	0	2	2	1	0	1	9
27	Observer.3	Clinical	Baseline	Yes	7	3	67	2	1	B	0	1	0	0	1	3	7	1	1	2	1	B	0	1	0	0	0	2	BC	0	1	1	0	3	1	2	13	0	3	0	1	2	1	3	1	11
27	Observer.3	Clinical	20.min.After.Rescue.Analgesia	No	6	2	37	1	1	B	0	1	0	0	0	3	5	0	0	3	1	C	0	0	1	0	0	1	C	0	0	1	0	3	0	2	10	0	0	0	1	1	1	3	1	7
28	Observer.3	Clinical	Baseline	Yes	6	3	72	1	2	AB	1	1	0	0	1	1	5	2	3	3	0	A	1	0	0	0	0	2	BC	0	1	1	0	0	0	0	10	0	3	0	1	0	0	0	2	6
28	Observer.3	Clinical	20.min.After.Rescue.Analgesia	No	4	2	34	1	0	X	0	0	0	0	0	3	4	0	0	.	0	A	1	0	0	0	0	0	X	0	0	0	0	3	0	0	3	0	0	.	0	1	0	1	1	3
29	Observer.3	Clinical	Baseline	Yes	7	3	66	2	3	ABD	1	1	0	1	1	2	8	2	1	2	2	BC	0	1	1	0	0	2	AC	1	0	1	0	2	1	2	14	0	4	0	1	2	1	1	1	10
29	Observer.3	Clinical	20.min.After.Rescue.Analgesia	No	4	2	39	1	1	.	.	.	.	.	1	2	5	1	1	2	1	B	0	1	0	0	0	0	X	0	0	0	0	1	0	0	6	0	3	0	1	2	0	1	1	8
30	Observer.3	Clinical	Baseline	Yes	7	3	76	2	2	BD	0	1	0	1	1	2	7	2	2	3	2	BC	0	1	1	0	0	3	ABC	1	1	1	0	2	1	3	18	0	3	0	0	1	1	1	4	10
30	Observer.3	Clinical	20.min.After.Rescue.Analgesia	No	5	2	48	1	0	X	0	0	0	0	1	1	3	1	1	3	1	B	0	1	0	0	0	1	C	0	0	1	0	1	1	0	9	0	3	0	0	0	1	1	1	6
31	Observer.3	Clinical	Baseline	Yes	4	2	26	0	0	X	0	0	0	0	1	2	3	0	0	1	1	B	0	1	0	0	0	0	X	0	0	0	0	1	2	0	5	0	1	0	1	1	0	1	1	5
31	Observer.3	Clinical	20.min.After.Rescue.Analgesia	No	2	1	19	0	0	X	0	0	0	0	0	0	0	0	0	1	1	B	0	1	0	0	0	0	X	0	0	0	0	0	0	0	2	0	1	0	1	1	1	1	1	6
32	Observer.3	Clinical	Baseline	Yes	6	3	58	3	1	B	0	1	0	0	1	1	6	3	1	0	1	D	0	0	0	1	0	1	D	0	0	0	1	1	0	0	7	0	1	1	1	1	0	4	1	9
32	Observer.3	Clinical	20.min.After.Rescue.Analgesia	No	2	2	27	0	0	X	0	0	0	0	0	1	1	0	1	3	0	A	1	0	0	0	0	0	X	0	0	0	0	0	0	0	4	0	0	0	0	0	0	0	1	1
33	Observer.3	Clinical	Baseline	Yes	6	3	60	1	0	X	0	0	0	0	1	2	4	1	3	1	2	BD	0	1	0	1	0	0	X	0	0	0	0	3	3	0	13	0	3	0	0	0	0	1	1	5
33	Observer.3	Clinical	20.min.After.Rescue.Analgesia	No	2	1	3	0	0	X	0	0	0	0	0	0	0	0	1	1	2	BD	0	1	0	1	0	0	X	0	0	0	0	0	0	0	4	0	0	.	1	0	0	0	1	2
34	Observer.3	Clinical	Baseline	Yes	9	4	92	2	2	AB	1	1	0	0	1	2	7	2	1	2	2	DE	0	0	0	1	1	2	BC	0	1	1	0	2	2	2	15	0	4	0	1	1	2	3	2	13
34	Observer.3	Clinical	20.min.After.Rescue.Analgesia	No	6	3	60	1	0	X	0	0	0	0	2	2	5	1	2	3	2	DE	0	0	0	1	1	0	X	0	0	0	0	2	2	2	14	0	3	0	1	0	1	1	2	8
35	Observer.3	Clinical	Baseline	Yes	6	3	64	1	1	B	0	1	0	0	1	2	5	1	1	2	1	C	0	0	1	0	0	1	C	0	0	1	0	2	2	2	12	0	3	0	0	1	1	2	1	8
35	Observer.3	Clinical	20.min.After.Rescue.Analgesia	No	3	2	42	0	1	B	0	1	0	0	1	1	3	0	1	2	1	B	0	1	0	0	0	1	C	0	0	1	0	1	1	2	9	0	0	0	1	0	0	2	1	4
36	Observer.3	Clinical	Baseline	Yes	3	2	20	0	0	X	0	0	0	0	0	3	3	0	1	3	2	BD	0	1	0	1	0	0	X	0	0	0	0	3	2	2	13	0	1	0	0	0	1	3	2	7
36	Observer.3	Clinical	20.min.After.Rescue.Analgesia	No	3	2	14	0	0	X	0	0	0	0	1	0	1	0	1	2	1	C	0	0	1	0	0	0	X	0	0	0	0	0	0	0	4	0	0	0	0	1	1	0	1	3
37	Observer.3	Clinical	Baseline	Yes	5	3	51	1	1	A	1	0	0	0	1	1	4	1	1	2	1	B	0	1	0	0	0	1	B	0	1	0	0	1	0	1	8	0	2	0	0	0	1	1	2	6
37	Observer.3	Clinical	20.min.After.Rescue.Analgesia	No	3	2	40	1	0	X	0	0	0	0	1	0	2	1	1	2	0	A	1	0	0	0	0	0	X	0	0	0	0	0	0	1	5	0	1	0	1	1	0	1	1	5
38	Observer.3	Clinical	Baseline	Yes	6	3	69	2	1	B	0	1	0	0	0	2	5	1	1	2	0	A	1	0	0	0	0	2	AC	1	0	1	0	3	3	2	14	0	3	0	2	1	1	2	1	10
38	Observer.3	Clinical	20.min.After.Rescue.Analgesia	No	4	2	52	0	0	X	0	0	0	0	0	2	2	0	1	2	0	A	1	0	0	0	0	0	X	0	0	0	0	2	0	2	7	0	0	0	0	0	1	2	1	4
39	Observer.3	Clinical	Baseline	Yes	7	3	74	2	1	A	1	0	0	0	1	2	6	2	1	2	2	BC	0	1	1	0	0	1	C	0	0	1	0	2	1	0	11	0	1	0	1	1	1	0	4	8
39	Observer.3	Clinical	20.min.After.Rescue.Analgesia	No	4	2	35	0	0	X	0	0	0	0	2	1	3	0	0	2	1	B	0	1	0	0	0	0	X	0	0	0	0	1	0	0	4	0	1	0	0	0	1	0	1	3
40	Observer.3	Clinical	Baseline	Yes	4	2	17	0	1	B	0	1	0	0	1	1	3	1	1	2	0	A	1	0	0	0	0	1	A	1	0	0	0	0	2	0	7	0	1	0	1	0	0	1	1	4
40	Observer.3	Clinical	20.min.After.Rescue.Analgesia	No	2	1	7	0	0	X	0	0	0	0	0	0	0	0	0	1	0	A	1	0	0	0	0	0	X	0	0	0	0	0	0	0	1	0	0	0	0	0	1	0	1	2
41	Observer.3	Clinical	Baseline	Yes	5	3	55	2	1	B	0	1	0	0	1	1	5	1	1	2	1	B	0	1	0	0	0	1	C	0	0	1	0	1	0	0	7	0	0	0	1	1	0	4	1	7
41	Observer.3	Clinical	20.min.After.Rescue.Analgesia	No	2	2	19	1	0	X	0	0	0	0	3	0	4	1	1	1	1	D	0	0	0	1	0	0	X	0	0	0	0	0	1	0	5	0	3	0	0	0	1	0	1	5
42	Observer.3	Clinical	Baseline	Yes	3	2	23	0	0	X	0	0	0	0	0	2	2	0	1	1	1	B	0	1	0	0	0	0	X	0	0	0	0	0	1	0	4	0	0	0	0	0	1	0	2	3
42	Observer.3	Clinical	20.min.After.Rescue.Analgesia	No	2	1	17	0	0	X	0	0	0	0	0	0	0	0	1	0	1	B	0	1	0	0	0	0	X	0	0	0	0	0	0	0	2	0	0	0	0	0	1	0	1	2
43	Observer.3	Control	Baseline	Not.Aplicable	1	1	0	0	0	X	0	0	0	0	1	2	3	0	0	0	0	A	1	0	0	0	0	1	.	.	.	.	.	1	3	0	5	0	1	0	0	2	1	2	1	7
43	Observer.3	Control	30.min.Postoperative	Not.Aplicable	1	1	1	0	0	X	0	0	0	0	0	3	3	0	0	0	0	A	1	0	0	0	0	0	X	0	0	0	0	3	3	0	6	0	1	0	0	0	0	4	0	5
43	Observer.3	Control	60.min.Postoperative	Not.Aplicable	1	1	2	0	0	X	0	0	0	0	0	2	2	0	0	0	0	A	1	0	0	0	0	0	X	0	0	0	0	1	1	0	2	0	0	0	0	0	0	1	0	1
43	Observer.3	Control	90.min.Postoperative	Not.Aplicable	1	1	1	0	0	X	0	0	0	0	0	2	2	0	0	0	0	A	1	0	0	0	0	0	X	0	0	0	0	1	2	0	3	0	0	0	0	0	0	4	0	4
43	Observer.3	Control	120.min.Postoperative	Not.Aplicable	1	1	0	0	1	.	.	.	.	.	0	1	2	0	0	2	0	A	1	0	0	0	0	1	.	.	.	.	.	1	1	0	5	0	0	0	1	1	1	1	0	4
44	Observer.3	Control	Baseline	Not.Aplicable	1	1	1	0	0	X	0	0	0	0	0	0	0	0	0	0	0	A	1	0	0	0	0	0	X	0	0	0	0	0	0	0	0	0	0	0	0	0	0	1	0	1
44	Observer.3	Control	30.min.Postoperative	Not.Aplicable	1	1	2	0	0	X	0	0	0	0	0	0	0	0	0	1	0	A	1	0	0	0	0	0	X	0	0	0	0	0	0	0	1	0	0	0	0	0	0	1	0	1
44	Observer.3	Control	60.min.Postoperative	Not.Aplicable	1	1	1	0	0	X	0	0	0	0	0	1	1	0	0	1	0	A	1	0	0	0	0	0	X	0	0	0	0	0	0	0	1	0	0	0	0	0	0	1	0	1
44	Observer.3	Control	90.min.Postoperative	Not.Aplicable	1	1	0	0	0	X	0	0	0	0	0	1	1	0	0	0	0	A	1	0	0	0	0	0	X	0	0	0	0	0	0	0	0	0	0	0	0	0	0	1	0	1
44	Observer.3	Control	120.min.Postoperative	Not.Aplicable	1	1	1	0	0	X	0	0	0	0	0	1	1	0	0	1	0	A	1	0	0	0	0	0	X	0	0	0	0	0	0	0	1	0	0	0	0	0	0	0	0	0
45	Observer.3	Control	Baseline	Not.Aplicable	1	1	15	2	0	X	0	0	0	0	1	3	6	1	1	3	2	.	0	.	.	.	.	0	X	0	0	0	0	3	3	0	13	0	2	0	1	0	1	1	2	7
45	Observer.3	Control	30.min.Postoperative	Not.Aplicable	1	1	7	2	0	X	0	0	0	0	1	3	6	2	1	3	2	BD	0	1	0	1	0	1	B	0	1	0	0	3	3	3	18	0	2	0	1	0	2	3	2	10
45	Observer.3	Control	60.min.Postoperative	Not.Aplicable	2	1	23	2	0	X	0	0	0	0	1	2	5	1	3	3	2	BD	0	1	0	1	0	0	X	0	0	0	0	3	3	2	17	0	2	0	0	0	1	3	2	8
45	Observer.3	Control	90.min.Postoperative	Not.Aplicable	1	1	8	2	0	X	0	0	0	0	1	0	3	2	1	3	1	B	0	1	0	0	0	1	B	0	1	0	0	0	0	0	8	0	2	0	1	0	1	0	2	6
45	Observer.3	Control	120.min.Postoperative	Not.Aplicable	1	1	10	2	0	X	0	0	0	0	1	2	5	2	1	2	2	BD	0	1	0	1	0	0	X	0	0	0	0	1	1	2	11	0	2	0	1	0	1	2	2	8
46	Observer.3	Control	Baseline	Not.Aplicable	1	1	6	1	0	X	0	0	0	0	0	2	3	1	1	2	2	BD	0	1	0	1	0	0	X	0	0	0	0	1	1	2	10	0	3	0	1	0	2	1	1	8
46	Observer.3	Control	30.min.Postoperative	Not.Aplicable	1	1	5	1	0	X	0	0	0	0	1	1	3	1	1	2	1	B	0	1	0	0	0	1	.	.	.	.	.	1	1	2	10	0	3	0	0	0	2	3	2	10
46	Observer.3	Control	60.min.Postoperative	Not.Aplicable	1	1	4	1	0	X	0	0	0	0	1	1	3	1	1	3	2	BD	0	1	0	1	0	1	.	.	.	.	.	2	1	2	13	0	3	0	0	0	1	3	2	9
46	Observer.3	Control	90.min.Postoperative	Not.Aplicable	1	1	3	2	0	X	0	0	0	0	1	2	5	2	1	2	2	BD	0	1	0	1	0	0	X	0	0	0	0	1	1	2	11	0	3	0	0	0	2	2	2	9
46	Observer.3	Control	120.min.Postoperative	Not.Aplicable	1	1	4	2	0	X	0	0	0	0	1	3	6	2	2	1	1	B	0	1	0	0	0	1	B	0	1	0	0	3	3	3	16	0	3	0	1	0	2	2	2	10
47	Observer.3	Control	Baseline	Not.Aplicable	1	1	2	0	0	X	0	0	0	0	0	0	0	0	0	0	0	A	1	0	0	0	0	0	X	0	0	0	0	0	0	0	0	0	0	0	0	0	0	0	0	0
47	Observer.3	Control	30.min.Postoperative	Not.Aplicable	1	1	1	0	1	B	0	1	0	0	0	0	1	0	0	2	0	A	1	0	0	0	0	1	C	0	0	1	0	0	0	0	3	0	0	0	0	0	0	0	0	0
47	Observer.3	Control	60.min.Postoperative	Not.Aplicable	1	1	2	0	0	X	0	0	0	0	0	1	1	0	0	0	0	A	1	0	0	0	0	0	X	0	0	0	0	0	1	0	1	0	0	0	0	0	0	1	0	1
47	Observer.3	Control	90.min.Postoperative	Not.Aplicable	1	1	0	0	0	X	0	0	0	0	0	0	0	0	0	2	0	A	1	0	0	0	0	0	X	0	0	0	0	0	0	0	2	0	0	0	0	0	0	1	0	1
47	Observer.3	Control	120.min.Postoperative	Not.Aplicable	1	1	1	0	0	X	0	0	0	0	0	0	0	0	0	0	0	A	1	0	0	0	0	0	X	0	0	0	0	0	0	0	0	0	0	0	1	0	0	0	0	1
48	Observer.3	Control	Baseline	Not.Aplicable	1	1	2	2	1	B	0	1	0	0	1	0	4	2	1	2	1	B	0	1	0	0	0	1	C	0	0	1	0	0	0	0	7	0	3	0	1	0	1	0	2	7
48	Observer.3	Control	30.min.Postoperative	Not.Aplicable	1	1	0	2	1	B	0	1	0	0	1	0	4	2	1	2	1	B	0	1	0	0	0	1	C	0	0	1	0	0	0	0	7	0	3	0	0	0	0	1	2	6
48	Observer.3	Control	60.min.Postoperative	Not.Aplicable	1	1	1	2	0	X	0	0	0	0	1	0	3	2	1	2	1	B	0	1	0	0	0	0	X	0	0	0	0	0	0	0	6	0	3	0	0	0	1	0	2	6
48	Observer.3	Control	90.min.Postoperative	Not.Aplicable	1	1	1	2	0	X	0	0	0	0	1	0	3	2	1	2	1	B	0	1	0	0	0	0	X	0	0	0	0	0	0	0	6	0	3	0	0	0	1	0	1	5
48	Observer.3	Control	120.min.Postoperative	Not.Aplicable	1	1	2	1	0	X	0	0	0	0	0	0	1	1	1	2	1	B	0	1	0	0	0	0	X	0	0	0	0	0	0	0	5	0	0	0	1	0	0	0	1	2
49	Observer.3	Control	Baseline	Not.Aplicable	1	1	3	0	0	X	0	0	0	0	0	0	0	0	0	0	0	A	1	0	0	0	0	0	X	0	0	0	0	0	0	0	0	0	0	0	0	0	0	0	0	0
49	Observer.3	Control	30.min.Postoperative	Not.Aplicable	1	1	1	0	0	X	0	0	0	0	0	0	0	0	0	0	0	A	1	0	0	0	0	0	X	0	0	0	0	0	0	0	0	0	0	0	0	0	0	0	0	0
49	Observer.3	Control	60.min.Postoperative	Not.Aplicable	1	1	0	0	0	X	0	0	0	0	0	0	0	0	0	0	0	A	1	0	0	0	0	0	X	0	0	0	0	0	0	0	0	0	0	0	1	0	0	0	1	2
49	Observer.3	Control	90.min.Postoperative	Not.Aplicable	1	1	0	0	0	X	0	0	0	0	0	0	0	0	0	0	0	A	1	0	0	0	0	0	X	0	0	0	0	0	0	0	0	0	0	0	0	0	0	0	1	1
49	Observer.3	Control	120.min.Postoperative	Not.Aplicable	1	1	0	0	0	X	0	0	0	0	0	0	0	0	0	0	0	A	1	0	0	0	0	0	X	0	0	0	0	0	0	0	0	0	0	0	0	0	0	0	1	1
50	Observer.3	Control	Baseline	Not.Aplicable	1	1	2	0	0	X	0	0	0	0	0	0	0	0	0	0	0	A	1	0	0	0	0	0	X	0	0	0	0	0	0	0	0	0	0	0	0	0	0	0	0	0
50	Observer.3	Control	30.min.Postoperative	Not.Aplicable	1	1	0	0	0	X	0	0	0	0	0	0	0	0	0	0	0	A	1	0	0	0	0	0	X	0	0	0	0	0	0	0	0	0	0	0	0	0	0	0	0	0
50	Observer.3	Control	60.min.Postoperative	Not.Aplicable	1	1	2	0	0	X	0	0	0	0	0	0	0	0	0	0	0	A	1	0	0	0	0	0	X	0	0	0	0	0	0	0	0	0	0	0	0	0	0	0	0	0
50	Observer.3	Control	90.min.Postoperative	Not.Aplicable	1	1	0	0	0	X	0	0	0	0	0	0	0	0	0	2	0	A	1	0	0	0	0	0	X	0	0	0	0	0	0	0	2	0	0	0	0	0	0	1	1	2
50	Observer.3	Control	120.min.Postoperative	Not.Aplicable	1	1	1	0	0	X	0	0	0	0	0	0	0	0	0	0	0	A	1	0	0	0	0	0	X	0	0	0	0	0	0	0	0	0	0	0	0	0	0	0	1	1
51	Observer.3	Control	Baseline	Not.Aplicable	1	1	1	1	0	X	0	0	0	0	1	0	2	1	0	0	0	A	1	0	0	0	0	0	X	0	0	0	0	0	0	0	1	0	0	0	0	0	0	0	1	1
51	Observer.3	Control	30.min.Postoperative	Not.Aplicable	1	1	0	0	0	X	0	0	0	0	0	0	0	0	0	0	0	A	1	0	0	0	0	0	X	0	0	0	0	0	0	0	0	0	0	0	1	0	0	0	1	2
51	Observer.3	Control	60.min.Postoperative	Not.Aplicable	1	1	1	0	0	X	0	0	0	0	0	0	0	0	0	2	0	A	1	0	0	0	0	0	X	0	0	0	0	0	0	0	2	0	0	0	0	0	0	0	1	1
51	Observer.3	Control	90.min.Postoperative	Not.Aplicable	1	1	0	0	0	X	0	0	0	0	1	0	1	0	0	2	0	A	1	0	0	0	0	0	X	0	0	0	0	0	0	0	2	0	0	0	1	0	0	0	1	2
51	Observer.3	Control	120.min.Postoperative	Not.Aplicable	1	1	0	0	0	X	0	0	0	0	1	0	1	0	0	2	0	A	1	0	0	0	0	0	X	0	0	0	0	0	0	0	2	0	0	0	2	0	0	0	1	3
52	Observer.3	Control	Baseline	Not.Aplicable	1	1	0	0	0	X	0	0	0	0	0	0	0	0	0	0	0	A	1	0	0	0	0	0	X	0	0	0	0	0	0	0	0	0	0	0	0	0	1	0	1	2
52	Observer.3	Control	30.min.Postoperative	Not.Aplicable	1	1	2	0	0	X	0	0	0	0	1	0	1	1	1	0	1	B	0	1	0	0	0	0	X	0	0	0	0	0	0	0	3	0	0	0	0	0	1	0	1	2
52	Observer.3	Control	60.min.Postoperative	Not.Aplicable	1	1	0	0	0	X	0	0	0	0	1	0	1	0	0	0	1	B	0	1	0	0	0	0	X	0	0	0	0	0	0	0	1	0	0	0	0	0	1	0	1	2
52	Observer.3	Control	90.min.Postoperative	Not.Aplicable	1	1	0	0	0	X	0	0	0	0	1	0	1	0	0	0	0	A	1	0	0	0	0	0	X	0	0	0	0	0	0	0	0	0	0	0	0	0	1	0	1	2
52	Observer.3	Control	120.min.Postoperative	Not.Aplicable	1	1	1	0	0	X	0	0	0	0	1	0	1	1	0	0	0	A	1	0	0	0	0	0	X	0	0	0	0	0	0	0	1	0	0	0	1	0	1	0	1	3

## Sheet: Notes
Dot (.) - Missing Data
X - Not Measured
NS - Numerical Ratio Scale
SDS - Simple Descriptive Scale
VAS - Visual Analog Scale
UFAPS-SF - Short Version of the UNESP-Botucatu Feline Acute Pain Scale
UFAPS - UNESP-Botucatu Multidimensional Feline Acute Pain Scale
CMPS-Feline - Glasgow Feline Multidimensional Pain Scale
