# Supplementary material for: Clinical validation of the short and long UNESP-Botucatu scales for feline pain assessment
Source: PeerJ. 2021 Apr 12;9:e11225. doi: 10.7717/peerj.11225 (PMC8048399; doi:10.7717/peerj.11225)
Supplement: Table S1 [file peerj-09-11225-s002.xlsx]

## Sheet: TableS1
Cat	Group	Surgeries / Clinical pain conditions	Premedication	Route	Anti-inflammatory	Route	Induction	Maintenance	Perioperative Analgesia	Regional Anesthesia	Postsurgery Analgesia	1st Analgesc Rescue	Route	2nd Analgesic Rescue	Route	3rd Analgesic Rescue	Route
1	Orthopedic	Caudectomy	Methadone	Intramuscularly	Meloxicam	Intravenously	Propofol	Isoflurane		Sacrococcygeal epidural (Bupivacaine 0.5%)		Methadone	Intramuscularly	Dipyrone	Intravenously
2	Orthopedic	Humerus Osteosynthesis	Methadone	Intramuscularly	Meloxicam	Intravenously	Propofol Ketamine	Isoflurane		Brachial plexus block (Lidocaine 2% SV and Bupivacaine 0.5%)		Methadone	Intramuscularly	Dipyrone	Intravenously
3	Orthopedic	Colocephalectomy	Methadone	Intramuscularly	Meloxicam	Intravenously	Propofol Ketamine	Isoflurane		Lumbosacral epidural (Morphine and Bupivacaine 0.5%)		Methadone	Intramuscularly	Dipyrone	Intravenously	Ketamine Methadone	Intramuscularly Intramuscularly
4	Orthopedic	Colocephalectomy with humerus osteosynthesis	Methadone Xylazine	Intramuscularly Intramuscularly	Meloxicam	Intravenously	Propofol Ketamine Fentanyl	Isoflurane	Infusion of Fentanyl and Ketamine Fentanyl Ketamine	Brachial plexus block (Lidocaine 2% and Bupivacaine 0.5%) Sacrococcygeal epidural (Morphine and Bupivacaine 0.5%)		Methadone	Intramuscularly
5	Orthopedic	Tibia osteosynthesis	Methadone Xylazine	Intramuscularly Intramuscularly	Meloxicam	Intravenously	Propofol Ketamine	Isoflurane	Fentanyl		Methadone	Methadone	Intramuscularly	Dipyrone	Intravenously
6	Orthopedic	Traumatic cleft palate correction	Methadone	Intramuscularly	Meloxicam	Intravenously	Propofol	Isoflurane	Fentanyl Fentanyl	Inferior alveolar nerve block (bilateraly) and left maxillary nerve block (Lidocaine 2% SV)		Methadone	Intramuscularly	Ketamine	Intramuscularly
7	Orthopedic	Thoracolumbar spine stabilization	Methadone	Intramuscularly	Meloxicam	Intravenously	Propofol Ketamine Fentanyl	Isoflurane	Infusion of Fentanyl and Ketamine	Local morphine in spinal cord
8	Orthopedic	Tibia osteosynthesis	Methadone Xylazine	Intramuscularly Intramuscularly	Meloxicam	Intravenously	Propofol Ketamine	Isoflurane		Lumbosacral epidural (Bupivacaine 0.5% and Morphine )	Xylazine	Dipyrone	Intravenously
9	Orthopedic	Femur osteosynthesis	Methadone Xylazine	Intramuscularly Intramuscularly	Meloxicam	Intravenously	Propofol Ketamine	Isoflurane		Lumbosacral epidural (Bupivacaine 0.5% and Morphine )		Methadone Dipyrone	Intramuscularly Intravenously	Ketamine Methadone	Intramuscularly Intramuscularly
10	Orthopedic	Femur osteosynthesis	Methadone	Intramuscularly	Meloxicam	Intravenously	Propofol Ketamine Fentanyl	Isoflurane	Infusion of Fentanyl and Ketamine	Sciatic and femoral nerve block (Bupivacaine 0.5%)		Dipyrone	Intravenously	Methadone	Intramuscularly
11	Orthopedic	Femur osteosynthesis	Methadone	Intramuscularly	Meloxicam	Intravenously	Propofol Ketamine Fentanyl	Isoflurane	Infusion of Fentanyl and Ketamine		Methadone Dipyrone	Methadone	Intramuscularly	Ketamine Methadone	Intramuscularly Intramuscularly
12	Orthopedic	Caudectomy with colocephalectomy	Methadone	Intramuscularly	Meloxicam	Intravenously	Propofol Ketamine Fentanyl	Isoflurane	Infusion of Fentanyl and Ketamine Fentanyl Ketamine	Incisional local anesthesia (Lidocaine 2% SV and Bupivacaine 0.5%)	Methadone	Dipyrone	Intravenously	Methadone	Intravenously
13	Soft Tissue	Debridement of the wound	Methadone	Intramuscularly			Propofol Fentanyl	Isoflurane		Local (Lidocaine 2% SV)		Methadone	Intramuscularly	Dipyrone	Intravenously
14	Soft Tissue	Nodulectomy	Methadone	Intramuscularly	Meloxicam	Intravenously	Propofol	Isoflurane	Fentanyl
15	Soft Tissue	Unilateral mastectomy	Methadone	Intramuscularly	Meloxicam	Intravenously	Propofol Ketamine	Isoflurane	Fentanyl	Spine erector nerve block (Bupivacaine 0.25%) Subcostal tap block (Bupivacaine 0.25%)		Methadone	Intramuscularly
16	Soft Tissue	Bilateral mastectomy	Methadone	Intramuscularly	Meloxicam	Intravenously	Propofol Ketamine	Isoflurane	Fentanyl Ketamine	Spine Erector Nerve block (Bupivacaine 0,25%) Tap block (Bupivacaine 0,25%)		Methadone	Intramuscularly	Dipyrone	Intravenously	Methadone Ketamine	Intramuscularly Intramuscularly
17	Soft Tissue	Cystotomy	Methadone Xylazine	Intramuscularly Intramuscularly	Meloxicam	Intravenously	Propofol Fentanyl	Isoflurane		Local (Lidocaine 2% SV)		Methadone	Intramuscularly	Dipyrone	Intravenously
18	Soft Tissue	Reduction of bulbar protrusion with tarsorrhaphy	Methadone	Intramuscularly	Meloxicam	Intravenously	Propofol	Isoflurane
19	Soft Tissue	Removal of carcinoma on the eyelid	Methadone	Intramuscularly			Propofol Ketamine Fentanyl	Isoflurane				Methadone	Intramuscularly
21	Soft Tissue	Orchiectomy	Methadone	Intramuscularly	Meloxicam	Intravenously	Propofol	Isoflurane		Intratesticular block (Lidocaine 2% SV)
23	Clinical	Trauma (fracture)										Methadone Xylazine	Intramuscularly Intramuscularly
24	Clinical	Trauma (fracture)										Methadone Xylazine	Intramuscularly Intramuscularly
25	Clinical	Trauma (fracture)										Methadone	Intramuscularly
26	Clinical	Trauma (wound)										Methadone	Intramuscularly
27	Clinical	Trauma (fracture)										Methadone Xylazine	Intramuscularly
28	Clinical	Pain after recent surgery (penectomy)										Methadone	Intravenously
29	Clinical	Trauma (wound)										Methadone	Intramuscularly
30	Clinical	Trauma (fracture)										Methadone	Intramuscularly
31	Clinical	Abdominal pain (fecaloma)										Methadone	Intramuscularly
32	Clinical	Pain after recent surgery (osteosynthesis)										Methadone	Intramuscularly
33	Clinical	Abdominal pain (lower urinary tract disease)										Nalbuphine	Intramuscularly
34	Clinical	Abdominal and sacral pain due to the trauma										Methadone Ketamine	Intramuscularly Intramuscularly
35	Clinical	Abdominal pain (lower urinary tract disease)										Nalbuphine	Intravenously
36	Clinical	Abscess in the left hind limb										Methadone Xylazine	Intramuscularly Intramuscularly
37	Clinical	Trauma (fracture)										Methadone	Intramuscularly
38	Clinical	Trauma (fracture)										Methadone	Intramuscularly
39	Clinical	Abdominal pain (lower urinary tract disease)										Methadone	Intramuscularly
40	Clinical	Abdominal pain (lower urinary tract disease)										Nalbuphine Ketamine	Intramuscularly Intramuscularly
41	Clinical	Trauma (wound)										Methadone Ketamine	Intramuscularly Intramuscularly
42	Clinical	Joint pain due to the migration of a pin after ulna osteosynthesis										Methadone	Intramuscularly
